061119

1  
2  
3  
4  
5  
6  
7  
8  
9  
10  
11  
12  
13  
14  
15  
16  
17  
18  
19  
20  
21  
22  
23  
24  
25  
26

**The primary cilium dampens proliferative signaling and represses a G2/M  
transcriptional network in quiescent myoblasts**

**Nisha Venugopal<sup>1</sup>, Ananga Ghosh<sup>1,4</sup>, Hardik Gala<sup>1</sup>, Ajoy Aloysius<sup>1,5</sup>, Neha Vyas<sup>2,3</sup>  
and Jyotsna Dhawan<sup>1,2</sup>**

<sup>1</sup>CSIR-Centre for Cellular and Molecular Biology, Hyderabad, 500007 India

<sup>2</sup>Institute for Stem Cell Science and Regenerative Medicine, Bengaluru, 560065 India

<sup>3</sup>Present address: St. John's Research Institute, Bengaluru, 560034 India

<sup>4</sup>Academy of Scientific and Innovative Research, Ghaziabad, 201002, India

<sup>5</sup>National Center for Biological Sciences, Bengaluru, 560065, India

**Running title: The primary cilium and control of quiescence**

**Keywords: Quiescence, myoblasts, G0, primary cilium, signaling**

Address correspondence to:

**Jyotsna Dhawan**

CSIR-Centre for Cellular and Molecular Biology

Uppal Road, Hyderabad-500 007, India.

Tel. (40)-2719-2544

Fax. (40)-2716-0591

Email [jdhawan@ccmb.res.in](mailto:jdhawan@ccmb.res.in)

061119

## 27 **Summary statement**

28       The primary cilium contributes to reversible arrest (quiescence) in skeletal muscle  
29 myoblasts, by coordinating and dampening mitogenic signaling focused on a G2/M  
30 transcriptional program and protein synthesis.

## 31 **Abstract**

32       Reversible cell cycle arrest (quiescence/G0) is characteristic of adult stem cells and is  
33 actively controlled at multiple levels. G0 cells extend a primary cilium, which functions as a  
34 signaling hub, but how it controls the quiescence program is not clear. Here, we report that  
35 primary cilia distinguish different states of cell cycle exit: quiescent myoblasts elaborate a  
36 primary cilium *in vivo* and *in vitro*, but terminally differentiated myofibers do not. Myoblasts  
37 where ciliogenesis is ablated using RNAi against a key ciliary assembly protein (IFT88) can exit  
38 the cell cycle but display an altered quiescence program and impaired self-renewal. Specifically,  
39 the G0 transcriptome in IFT88 knockdown cells is aberrantly enriched for G2/M regulators,  
40 suggesting a focused repression of this network by the cilium. Cilium-ablated cells also exhibit  
41 features of activation including enhanced activity of Wnt and mitogen signaling, and elevated  
42 protein synthesis via inactivation of the translational repressor 4EBP1. Taken together, our  
43 results show that the primary cilium integrates and dampens proliferative signaling, represses  
44 translation and G2/M genes, and is integral to the establishment of the quiescence program.

45

## 46 **Introduction**

47       Primary cilia are microtubule-based membrane-encased organelles that function to receive  
48 and transduce signals from the extracellular milieu (Singla and Reiter, 2006). These cellular  
49 antennae are intimately linked to the cell cycle, and barring rare instances (Paridaen et al., 2013;  
50 Riparbelli et al., 2012), the extension of the cilium is restricted to cells in G0/G1, and suppressed  
51 in other cell cycle phases (Goto et al., 2017). The primary cilium is formed from and anchored  
52 by a basal body, which is essentially a sequestered centrosome that has been modified for this  
53 role. Upon cell cycle re-entry, cilia are actively dismantled prior to mitosis, releasing the basal  
54 body to function as a microtubule-organizing centre (MTOC) for spindle assembly. Multiple  
55 proteins that play important ciliary roles are also involved in cell cycle regulation: for example,  
56 Aurora Kinase A (AurA), Polo Like Kinase-1 (Plk1), and Anaphase Promoting Complex (APC)  
57 are all key regulators of centrosome function and ciliary disassembly, as well as mitotic

061119

58 progression (reviewed in (Walz, 2017)). Thus, the current understanding is that the cilium exerts  
59 a check on cell cycle progression (reviewed in (Goto et al., 2013)) and that disassembly of the  
60 cilium is a prerequisite for cell cycle re-entry (Kim et al., 2011). The cilium is vital in embryonic  
61 patterning (Hirokawa et al., 2006), and its role in terminally differentiated adult cells such as  
62 kidney epithelia is critical for their function (Yoder, 2007). Mutations in ciliary genes give rise to  
63 a spectrum of complex diseases collectively termed ciliopathies (Hildebrandt et al., 2011),  
64 usually associated with cellular overgrowth, thus supporting an inhibitory influence of cilia on  
65 proliferation. However, the molecular mechanisms that couple ciliogenesis and cell cycle  
66 progression are still emerging and the functions of the cilium within the quiescent cell are largely  
67 unexplored.

68 The quiescent state is critical for the function of adult stem cells, which contribute to  
69 regeneration and tissue homeostasis (reviewed in (Rumman et al., 2015)). In skeletal muscle,  
70 homeostatic maintenance of differentiated tissue, as well as its regeneration following injury, are  
71 made possible by a small population of stem cells called muscle satellite cells (MuSC) (Mauro,  
72 1961). These muscle precursors persist in a quiescent undifferentiated state in adult muscle and  
73 are activated to re-enter the cell cycle when the tissue experiences damage. The majority of  
74 activated MuSC enter a program of proliferation and differentiation to regenerate damaged  
75 myofibers, while a minor subset enters a distinct program to self-renew and regenerate myofiber-  
76 associated quiescent MuSC, thus leading to functional tissue recovery (Morgan and Partridge,  
77 2003). Although a number of signaling, metabolic, transcriptional and epigenetic regulatory  
78 circuits have been implicated in MuSC quiescence (Cheung and Rando, 2013), the mechanisms  
79 that govern its establishment during early postnatal development and its maintenance during  
80 adult life are still being uncovered. Recently, quiescent MuSC were shown to possess primary  
81 cilia, which were implicated in the regulation of asymmetric cell division during cell cycle  
82 activation (Jaafar Marican et al., 2016). However, the genetic and signaling networks potentially  
83 controlled by the cilium within quiescent MuSC are not known.

84 Here, we investigate the role of the primary cilium in quiescence using an established  
85 culture system to model alternate MuSC fates: asynchronously proliferating C2C12 myoblasts  
86 can be driven to enter either reversible (Arora et al., 2017; Sachidanandan et al., 2002) or  
87 terminal cell cycle exit (Blau et al., 1983), by modulating culture conditions. We show that not  
88 only are primary cilia present on quiescent MuSC *in vivo*, and elaborated during quiescence *in*

061119

89 *vitro*, but are also transiently induced during early myogenic differentiation. When ciliogenesis is  
90 ablated using RNAi against IFT88, a key intraflagellar transport protein involved in ciliary  
91 extension, an altered quiescence-reactivation program is observed. Additionally, IFT88  
92 knockdown in G0 leads to specific induction of G2/M transcriptional networks, and cells lacking  
93 cilia display enhanced activity of multiple cilium-associated signaling pathways, accompanied  
94 by an increase in protein synthesis, with a specific shift towards 4EBP1-regulated translation.  
95 Intriguingly, knockdown cells do not show increased DNA synthesis or mitosis. These  
96 observations suggest that in quiescent cells, loss of this cellular antenna relieves the repression  
97 on mitogenic signaling but additional events are required to trigger the exit from quiescence. Our  
98 findings support the existence of complex interplay between the cilium cycle and the cell cycle at  
99 both transcriptional and translational levels. Overall, our study reveals that specific repression of  
100 G2/M genes by the primary cilium is integral to the establishment of the self-renewing quiescent  
101 state in culture, with implications for stem cell maintenance and function.

102

## 103 **Results**

### 104 **Primary cilia are dynamically regulated during the cell cycle in myogenic cells**

105 Earlier, we showed that quiescent myoblasts in culture display a distinct transcriptional  
106 profile, with altered signaling modules, in particular, enhanced Wnt-TCF signaling (Aloysius et  
107 al., 2018; Subramaniam et al., 2013). Interestingly, a number of cilium-associated genes showed  
108 increased expression in G0. We compiled a putative “ciliome” consisting of 1896 cilium-related  
109 genes curated from available datasets from different cell types (Kim et al., 2010; McClintock et  
110 al., 2008). Comparison of the “ciliome” with the “G0 altered” transcriptome consisting of 1747  
111 annotated Differentially Expressed Genes derived from a microarray analysis of C2C12  
112 myoblasts in proliferation vs. quiescence (Subramaniam et al., 2013), yielded substantial overlap  
113 (345 genes [19%],  $p$ -value: 1.717854e-19) (Fig. S1A). Selected transcripts encoding cilium-  
114 associated proteins were validated as up-regulated in quiescent myoblasts (Fig. S1B). Together,  
115 these findings suggest a previously unreported induction of a ciliary transcriptional program in  
116 skeletal muscle myoblast quiescence.

117 To investigate whether the transcriptional induction of ciliary genes is accompanied by the  
118 elaboration of primary cilia in G0 myoblasts, we used immunofluorescence analysis. C2C12  
119 myoblasts grow asynchronously in adherent culture and can be triggered to enter reversible arrest



061119

120 (quiescence/G0) by culture in suspension, where deprivation of adhesion leads to cessation of  
121 cell division (Milasincic et al., 1996; Sachidanandan et al., 2002). G0 is rapidly reversed upon re-  
122 plating onto a culture surface, wherein cells synchronously re-enter the cell cycle. In actively  
123 proliferating cultures, 24% of cells were found to be ciliated (Fig. 1A, B). This population  
124 heterogeneity is consistent with the asynchronous distribution in different cell cycle phases and  
125 the extension of primary cilia only during a restricted window of the cell cycle, in G1/G0.  
126 Suspension-arrested myoblasts showed an increase in ciliation with ~60% of G0 cells marked by  
127 primary cilia, which is reversed upon reactivation into the cell cycle, wherein the frequency of  
128 ciliated cells returned to 23% within 24 hrs (Fig. 1A, B). In addition, G0 cells showed an  
129 increased average ciliary length: 70% of cilia were  $> 2 \mu\text{m}$  (Fig. 1C). By contrast, proliferating  
130 cells display shorter cilia: only ~30% of cilia were  $> 2 \mu\text{m}$  (Fig. 1C).

131 To establish the dynamics of cilium acquisition during cell cycle exit, we isolated cells at  
132 different time points after induction of quiescence and stained for acetylated-tubulin. Cells  
133 showed a rapid increase in ciliation during the early stages of quiescence entry to reach a  
134 maximum of ~60% ciliated cells at 24 hrs post suspension, after which there was little change  
135 (Fig. 1D) until the time of harvest (48 hrs). The increase in ciliated cells correlates with the loss  
136 of markers of proliferation Ki67 and Cyclin A2, and induction of the growth arrest-specific  
137 (GAS) gene PDGFR $\alpha$  (Schneider et al., 2005) (Fig. S2). We also analyzed the dynamics of  
138 cilium loss during reactivation out of G0, and observed a rapid and complete loss of primary cilia  
139 within 30 minutes of re-plating. With progression past the G0-G1 transition (6 hrs) and entry into  
140 S phase (12 hrs), the frequency of ciliated cells gradually increased, reaching ~20% at 24 hours  
141 post re-plating (Fig. 1E), by which time the culture resembles a pre-quiescent population of  
142 asynchronously proliferating myoblasts (Fig 1B). These results establish that as in other cell  
143 types, quiescence in myoblasts is associated with a reversible extension of longer cilia on a larger  
144 proportion of cells than observed in proliferating cultures. The increased frequency and length of  
145 cilia in G0 myoblasts, and the rapid loss of ciliation within minutes of reactivation supports the  
146 notion of the cilium as an inhibitory influence on cell cycle re-entry and progression, as  
147 described in other cell types (Kim et al., 2011).

148

149 **Myogenic differentiation involves a transient ciliation event**

061119

150 Myoblasts exit the cell cycle irreversibly during myogenic differentiation. We used  
151 immunofluorescence analysis to establish the status of ciliation during entry into terminal arrest.  
152 By contrast to reversibly arrested myoblasts, terminally differentiated myotubes lacked primary  
153 cilia (Fig. 1F). However, we observed a transient phase of ciliation in early differentiating  
154 cultures prior to myoblast fusion, with a steady increase in the frequency of ciliated cells from as  
155 early as 6 hrs in differentiation medium, to a maximum of 53% observed at 24 hrs. High levels of  
156 ciliation were still observed at 48 hrs when fusion of myoblasts into myotubes was evident (Fig.  
157 1G). A recent report of this transient ciliation suggested that Hh signaling during the induction of  
158 myogenic differentiation is mediated by the primary cilium and that deregulation of this node is  
159 associated with tumorigenesis (rhabdomyosarcoma formation) (Fu et al., 2014). Interestingly,  
160 although the time window of transient ciliation corresponds to the increase in expression of  
161 Myogenin, a key regulator of differentiation (Fig. 1H), we found little overlap between cells  
162 expressing Myogenin and those bearing a primary cilium in differentiating cultures (Fig. 1I). Our  
163 observations suggest that establishment of the myogenic program is specifically excluded in cells  
164 bearing primary cilia.

165

### 166 **Reversibly arrested reserve cells in differentiating cultures are ciliated**

167 Cultures triggered for myogenic differentiation yield a heterogeneous population: at 5 days  
168 post serum withdrawal, while ~80% of nuclei may be found in multinucleated myotubes, the  
169 remaining ~20% constitute mononuclear “reserve cells” (Yoshida et al., 1998), a pool of  
170 quiescent undifferentiated cells that retain the ability to re-enter the cell cycle if proliferative  
171 conditions are restored (Abou-Khalil et al., 2013). We separated out the mononucleated  
172 (undifferentiated) fraction from differentiating cultures and verified that these cells do not  
173 express Myogenin (Fig. S3). As seen in suspension-arrested G0 myoblasts, ~50% of unfused  
174 reserve cells are ciliated (Fig. 1J) and account for the number of ciliated cells observed in early  
175 triggered cultures. Taken together, these results show that the presence of primary cilia  
176 distinguishes reversibly arrested from irreversibly arrested cells.

177

### 178 **Quiescent satellite cells *in vivo* are marked by primary cilia**

179 Recently, primary cilia were shown to be preferentially present on quiescent MuSC and not  
180 on activated MuSC, where they play a role in asymmetric cell division during the early

061119

181 regenerative response (Jaafar Marican et al., 2016). To investigate whether cilia are associated  
182 with reversibly versus irreversibly arrested muscle cells *in vivo*, we isolated single muscle fibers  
183 from the mouse Extensor Digitorum Longus (EDL) muscle and probed for the cilium by  
184 immunofluorescence analysis. We detected primary cilia on ~70% of Pax7<sup>+</sup> quiescent MuSC but  
185 no cilia were found on the rest of the myofiber membrane, either associated with myonuclei  
186 (Pax7<sup>-</sup>) (Fig. 1K) or elsewhere. Thus, as seen in cultured myoblasts, most quiescent MuSC are  
187 ciliated, while the differentiated myofibers are not, indicating that the cilium distinguishes  
188 reversible from irreversible arrest *in vivo* as well.

189

### 190 **Abrogation of ciliary extension leads to loss of canonical features of quiescence**

191 Ciliary extension critically depends on intra-flagellar transport (IFT), the process by which  
192 material is transported on stable microtubule tracks in the cilium core. IFT is regulated by a  
193 number of genes, primarily encoding motor proteins and adaptors that link cargo to the  
194 cytoskeleton (Hao and Scholey, 2009). Since ciliary extension was triggered in myoblasts early  
195 after receiving cues for cell cycle exit, we postulated that the primary cilium is involved in the  
196 regulation of cell cycle exit programs and cell fate determination. To explore this connection, we  
197 investigated the ability of cells to enter G0 when ciliogenesis was blocked by siRNA-mediated  
198 suppression of a key anterograde transport protein IFT88. siRNA treatment resulted in a 60%  
199 reduction in the mRNA levels (Fig. 2A) and a 92% reduction in protein levels of IFT88 (Fig.  
200 2B), compared to control. Knockdown of IFT88 led to significant suppression of ciliogenesis  
201 (Fig. 2C, D). Interestingly, we observed a stage-specific effect of cilium knockdown. Contrary to  
202 earlier reports where blocking ciliogenesis in HeLa cells results in hyper-proliferation (Robert et  
203 al., 2007), cilium knockdown in myoblasts under growth conditions, did not lead to increased  
204 proliferation, as evidenced by unchanged frequencies of Ki67<sup>+</sup> cells (Fig. 2E). However, when  
205 knockdown cells were triggered to enter quiescence, we observed an increased frequency of  
206 Ki67<sup>+</sup> cells compared to control cells (Fig. 2F). Knockdown populations also showed a  
207 decreased frequency of cells expressing the quiescence marker, p27 (Fig. 2G). Interestingly, cell  
208 cycle analysis revealed that myoblasts lacking cilia display an altered FACS profile with an  
209 increased proportion of G2/M cells (Fig. 2H). These results indicate that suppressing ciliary  
210 extension compromises entry into G0.

211

061119

## 212 **Transcriptome profiling reveals a stage-specific cell cycle block in IFT88 knockdown cells**

213 To determine the scale of changes that contribute to the altered quiescent state, we used  
214 global transcriptome profiling. Proliferating myoblasts (MB) were transfected with either IFT88  
215 siRNA or a non-targeting control siRNA following which cells were transferred to suspension  
216 culture for 48 hours to induce quiescence (G0) and subsequently reactivated for 2 hours by re-  
217 plating (R2). Affymetrix microarrays were queried with RNA isolated from cells in these three  
218 different states and a comparative analysis was performed between control and knockdown  
219 samples for each cell state.

220 The transcriptional profile of IFT88KD myoblasts was consistent with the stage-specific  
221 cell cycle phenotype observed and showed maximum shifts from the profile of control cells at  
222 conditions of G0 (Fig. 3A, B). Fewer genes were altered in proliferating conditions (51 up-  
223 regulated, 31 down-regulated), whereas, knockdown cells held in conditions that normally  
224 induce G0 showed a larger number of genes with altered expression (253 genes up-regulated,  
225 157 genes down-regulated). Thus, IFT88KD myoblasts cultured in suspension have a  
226 transcriptional profile distinct from control cells (Fig. 3A). A similarly altered profile was also  
227 seen in reactivated cells (R2), where 168 genes were up-regulated and 85 genes down-regulated  
228 (Fig. 3A, B). Interestingly, in IFT88KD cells, G0 and R2 profiles were very similar, whereas in  
229 control cells, substantial alteration of the transcriptome reflecting the reactivation of the cell  
230 cycle program. Overall, these observations suggest that suppression of the cilium leads to a block  
231 beyond which cells neither entered nor exited quiescence normally.

232 To identify networks among the genes that were differentially regulated in cilium  
233 knockdown cells at G0 we used the STRING (Search Tool for the Retrieval of Interacting  
234 Genes/Proteins) database (Szklarczyk et al., 2015). The up-regulated genes formed a tight  
235 network, corresponding to 2 major clusters representing cell cycle regulation and myogenic  
236 differentiation, and a minor cluster consisting of genes regulating ECM and related signaling  
237 (Fig. 3C). The down-regulated genes formed a more diffuse network of genes involved in the  
238 regulation of cell proliferation and response to stimulus (Fig. S5).

239 To gain further insight into the molecular pathways that may be altered in cells where  
240 ciliogenesis is blocked, we used GSEA analysis (Mootha et al., 2003; Subramanian et al., 2005),  
241 which showed an enrichment of genes related to cell cycle in the transcriptome of IFT88  
242 knockdown cells (Fig. 3D). Notably, we observed an enrichment of genes that define a

061119

243 proliferation signature (pSig) when compared with earlier established gene sets defining  
244 quiescence and proliferation (Venezia et al., 2004) (Fig. 3D). Interestingly, the top ten gene sets  
245 with highest normalized enrichment score (NES) that were enriched in IFT88KD at quiescence  
246 conditions, represent genes that are involved in G2/M phases (Fig. 3E), which is consistent with  
247 the increased population of cells with 4N DNA content observed in the cell cycle profile (Fig.  
248 2F). Accumulation of cells at G2/M phases might reflect non-ciliary roles of IFT88 (Delaval et  
249 al., 2011), or a requirement for IFT88 in G2/M entry, with blocked cells yet to exit the cell cycle  
250 at the time of harvest. Therefore, we analyzed a time course of entry into quiescence to reveal  
251 any shifts in cell cycle exit profiles. Surprisingly, cells lacking cilia displayed similar exit  
252 kinetics to control cells and showed no significant change in the proportion of either S phase  
253 cells (EdU<sup>+</sup>) or M phase cells (Histone3pS10<sup>+</sup>) (Fig. 3F) across the time course. Taken together,  
254 these results suggest that IFT88KD cells do not enter M phase of the cell cycle but are paused at  
255 G2.

256 To resolve the paradox of increased proliferative gene expression in cells displaying a non-  
257 proliferative phenotype, we analysed the expression levels of selected G2/M candidate genes that  
258 were up-regulated in knockdown cells. Control G0 cells showed 50-500 fold lower expression of  
259 transcripts encoding G2/M regulators AurA, Bub1, Cdc20, CenpF, FoxM1, Mcm3/5, and Plk4  
260 compared to proliferating MB. Although there is increased expression of these G2/M marker  
261 genes in IFT88KD cells, the levels of these transcripts are still significantly lower than those  
262 observed in proliferating cells (10-50 fold lower) (Fig. 3G), suggesting that overall, the  
263 magnitude of altered expression may not achieve a threshold required for functional progression  
264 through G2 into M. Furthermore, GSEA analysis also revealed that the up-regulated genes in  
265 IFT88KD cells were involved in cell cycle checkpoints, in particular G2/M checkpoints  
266 involving DNA damage and mitotic spindle assembly, functions associated with the centrosome.  
267 Collectively, these results show that ablation of ciliogenesis leads to deviation from a canonical  
268 quiescence program, resulting in cells that are blocked at G2 rather than at G0, as defined by  
269 their transcriptional profile.

270 The second signature of up-regulated genes in IFT88KD cells represented myogenic  
271 regulators and muscle structural genes. Since the cilium is transiently induced during early  
272 differentiation and appears to be retained only in the minor population of non-differentiating  
273 reserve cells, the induction of myogenic genes in IFT88KD cells suggests that loss of the cilium

061119

274 de-repressed the differentiation program. The up-regulation of two gene networks representing  
275 opposing cell fates (cell cycle [G2/M] vs. differentiation) is consistent with the repression of  
276 both these states by signaling from the cilium.

277

### 278 **Myoblasts lacking cilia have reduced self-renewal potential**

279 Induction of quiescence is associated with enhanced clonogenic self-renewal when cells  
280 are restored to proliferative conditions (Rumman et al., 2018). Cells with impaired ciliogenesis  
281 showed a deviation from canonical features of G0 such as expression of p27 and 2N DNA  
282 content. Therefore, we evaluated the self-renewal capability in IFT88KD myoblasts post-  
283 quiescence using colony formation (CFU assay) and found that knockdown myoblasts showed  
284 reduced CFU compared to control cells (Fig. 4A). The kinetics of cell cycle re-entry were also  
285 affected, with a significant decrease in EdU incorporation at 24 hours post re-plating (Fig. 4B).  
286 Interestingly, similar to the cell cycle effect, this reduction in self-renewal is also stage-specific,  
287 with no significant impairment in CFU formation in proliferating cultures (Fig. S6). These  
288 results show that even though IFT88 is expressed in both proliferating and quiescent cells,  
289 compromising its expression specifically in conditions where the cilium is normally elaborated  
290 leads to decreased self-renewal ability, consistent with the failure to enter a canonical quiescence  
291 program due to suppressed ciliary extension.

292

### 293 **Myoblasts lacking cilia exhibit enhanced signaling activity**

294 The cilium is a known sensory hub that harbors receptors for multiple signaling pathways  
295 (reviewed in (Basten and Giles, 2013; Singla and Reiter, 2006)). The enrichment of Wnt, Hh and  
296 mitogen receptors in the cilium is thought to enable growth factor-induced reactivation out of  
297 G0. In our culture model, quiescence is triggered by the abrogation of adhesion-dependent  
298 signaling pathways (Dhawan and Helfman, 2004; Milasincic et al., 1996). To elucidate the  
299 mechanism by which suppression of the primary cilium contributes to an altered quiescent  
300 program, we examined possible shifts in signaling cascades. Consistent with the notion of  
301 aberrant signaling, GSEA analysis of IFT knockdown cells showed an enrichment of genes  
302 related to cilium-dependent signaling pathways (Fig. 4C), including Notch, Hh, Wnt, and growth  
303 factor signaling. The primary cilium is known to show cell type- and condition-specific  
304 influences in either promoting or dampening the activity of these pathways (Whewey et al.,



061119

305 2018). Using a combination of reporter assays, qRT-PCR and western blot analysis, we assessed  
306 the activity of cilium-related pathways that have been previously implicated in G0 (Coller et al.,  
307 2006; Sachidanandan et al., 2002; Subramaniam et al., 2013). We detected enhanced signaling  
308 through 3 specific pathways in IFT88 knockdown myoblasts. Wnt signaling was elevated as  
309 evidenced by increased Wnt-TCF reporter activity (TOPflash), and induction of the  
310 transcriptional effector, active (dephospho)  $\beta$ -catenin (Fig. 4D, E). Increased levels of IGFR  
311 protein and phosphorylation were also seen, as well as increased levels of a key mediator of the  
312 G0-G1 transition, PDGFRA (Fig. 4F). These results suggest that under quiescence conditions,  
313 the primary cilium functions to dampen multiple growth factor signaling pathways.

314 We further examined whether the observed induction of upstream growth factor signaling  
315 events in knockdown cells led to enhanced activity at downstream signaling nodes. mTOR  
316 activity is an important integrator of growth factor signaling and functions by targeting protein  
317 synthesis (Fingar and Blenis, 2004). Suppression of ciliary extension and increased growth factor  
318 signaling resulted in increased mTOR phosphorylation (Fig. 4G), consistent with relay of an  
319 upstream signal such as the activation of PDGFR or IGFR. Two critical downstream targets of  
320 mTOR that directly affect translational activity are ribosomal protein S6 (rpS6), which is  
321 activated upon phosphorylation by S6 kinase (S6K), and 4E-BP1, a translational repressor which  
322 is inactivated upon phosphorylation (reviewed in (Showkat et al., 2014)). Interestingly, while  
323 rpS6 did not show an increase in phosphorylation (Fig 4G), IFT88KD myoblasts showed an  
324 increase in phosphorylation of 4E-BP1.

325 We next investigated whether the observed increase in the level of mTOR activity towards  
326 4E-BP1 had phenotypic consequences i.e. increased translation. Indeed, we observed an  
327 appreciable increase in levels of protein synthesis in IFT88KD cells, as evidenced by the  
328 increased incorporation of OPP into newly synthesized proteins (Fig 4H). Taken together, this  
329 data suggests that the loss of the cilium channels mitogenic signals leading to translational  
330 control via one arm (4E-BP1) of the signaling pathway downstream of mTOR. 4E-BP1  
331 phosphorylation has been shown to be specifically elevated during myogenic differentiation  
332 (Pollard et al., 2014), and during M phase in cycling cells (Velásquez et al., 2016), consistent  
333 with the enrichment of cells displaying these two expression profiles in IFT88 knockdown  
334 conditions. Thus, presence of the cilium in G0 maintains 4EBP1 in its translationally repressive  
335 unphosphorylated state and dampens overall protein synthesis.



061119

336 In summary, this work shows the preferential extension of the cilium in muscle cells  
337 during reversible cell cycle arrest, but not during irreversible arrest/differentiation. Disruption of  
338 ciliation leads to an altered cell cycle distribution in IFT88KD cells, characterized by a block in  
339 G2 rather than G0, an altered transcriptome showing enhanced expression of regulators of G2/M  
340 checkpoints as well as enhanced expression of myogenic differentiation markers, reduced levels  
341 of classical quiescence indicators, aberrant re-entry and reduced self-renewal ability. Although  
342 suppression of ciliary extension correlated with increased activity of cilium-mediated signaling  
343 pathways, some downstream signaling nodes were not activated, likely accounting for the  
344 absence of enhanced proliferation. We conclude that cilium extension in quiescent myoblasts  
345 contributes to the acquisition of key features of G0 including the characteristic quiescence  
346 transcriptional program which features suppression of both cell cycle and myogenic genes, as  
347 well as dampened signaling to the translational machinery.

348

## 349 **Discussion**

350 In this study, we have explored the function of primary cilia in skeletal muscle myoblasts  
351 and report a novel role for the organelle in the establishment of quiescence. Existing reports  
352 linking the cilium to the cell cycle have focussed on transition from G1 to S phase (Robert et al.,  
353 2007), as well as re-entry into the cell cycle from a quiescent state (Kim et al., 2011). These  
354 studies have shown that resorption and modification of ciliary length and function contribute to  
355 cell cycle progression. Similarly, signaling pathways such as Hh and PDGF that act through the  
356 cilium also contribute to regulation of cell cycle progression (reviewed in (Pan et al., 2013)) and  
357 asymmetric cell division (Jaafar Marican et al., 2016). Although the primary cilium is a  
358 quiescence-associated structure, there is surprisingly scanty evidence of the function of the  
359 cilium-centrosome axis in G0. Our study bridges this gap, and provides evidence for repressive  
360 signaling from the cilium in establishment and/or maintenance of quiescence.

361 We show that as in other cells, primary ciliogenesis in myoblasts is induced during cell  
362 cycle exit. While this concurs with the well-established reciprocal relationship between the  
363 cilium cycle and cell cycle, we find that ciliation is sustained in quiescence, but lost in terminal  
364 differentiation, suggesting a role in distinguishing these non-dividing states. Increased  
365 ciliogenesis is observed within 24 hours of receiving cell cycle exit cues, a time when expression  
366 of classical quiescence markers (such as p27) or differentiation markers (such as Myogenin) is

061119

367 still low. Thus, formation of the cilium occurs subsequent to receiving cell cycle exit cues  
368 (reduced adhesion or reduced mitogen availability), but prior to maturation of quiescent or  
369 differentiated states, implying a role for the signaling hub in this cell fate decision.

370 Our data also indicate that primary cilia mark only those cells that exit the cell cycle  
371 reversibly. Thus, in apparently homogeneous cultures induced to undertake myogenic  
372 differentiation, the primary cilium may help to select a sub-population (reserve cells) that resists  
373 differentiation cues and retains stem cell characteristics. We also observe heterogeneity in  
374 ciliation status within quiescent populations, suggesting that not all cells entering quiescence are  
375 equally capable of ciliogenesis. This may have implications for quiescent adult muscle stem  
376 cells, where some evidence exists indicating a correlation between heterogeneity and different  
377 propensities for activation (Collins et al., 2005). In conjunction with the finding that primary  
378 cilia are preferentially assembled on self-renewing MuSC in vivo (Jaafar Marican et al., 2016;  
379 this study), this observation provides interesting avenues for future exploration of ciliary roles in  
380 adult stem cell fate. The enhanced signaling activity in cilium-ablated cells may indicate that the  
381 cilium provides a zone of regulation for these pathways, possibly by physically localizing  
382 signaling intermediates or mechanical cues.

383 Strikingly, when cells with impaired ciliogenesis were placed under conditions of  
384 suspension arrest, while they did not attain quiescence, they also did not display continued cell  
385 proliferation as might be expected from increased mitogenic signaling. Instead, cells lacking cilia  
386 showed no increase in EdU incorporation (S phase), or phosphorylated H3 (M phase). This is  
387 also in contrast with an earlier report highlighting the role of IFT88 in mitotic spindle  
388 organization, which showed that IFT88 knockdown in HeLa cells resulted in mitotic catastrophe  
389 and delays (Delaval et al., 2011). The observed accumulation of cells in the G2 phase in  
390 IFT88KD suggest either an incomplete reversal/residual retention of ciliary function, or the  
391 presence of an unreported role for the cilium in G2/M checkpoint control. The dual role of the  
392 centrosome/basal body and the relationship of the centrosome-cilium cycle with the cell cycle  
393 suggests possible mechanisms. When IFT is impaired, while ciliary extension is compromised,  
394 the centrosome-basal body transition may not be affected. Thus, the centrosome is likely still  
395 docked as a basal body and may not be free for its mitotic spindle functions, resulting in G2/M  
396 accumulation of cells unable to traverse that block. Alternatively, the centrosome and basal body  
397 may have differential affinity for localization for cell cycle regulatory proteins and disturbing

061119

398 this balance may result in aberrant regulation of cell cycle progression, since cell cycle regulators  
399 such as Cyclin B1, AurA and Plk1 are reported to localize to the centrosome or basal body and  
400 this localization is essential for their function (Jackman et al., 2003; Spalluto et al., 2013). Since  
401 the centrosome alternates as a spindle organizer in M phase and the ciliary basal body in G0, it is  
402 possible that communication between the cilium and G2/M transcriptional networks is mediated  
403 by centrosomal components. Thus, the incomplete induction of G2/M transcriptional programs  
404 observed in the IFT88KD cells may reflect an additional requirement for transition to  
405 centrosomal function required for M phase entry.

406 The centrosome has also been linked with translational regulation of M phase regulators:  
407 Plk1 was shown to co-localize with 4E-BP1 at centrosomes in mitotic cells, providing evidence  
408 for direct interaction and phosphorylation of 4E-BP1 by Plk1 (Shang et al., 2012). Interestingly,  
409 IFT88KD myoblasts induced to enter quiescence also show an increase in Plk1 expression as  
410 well as 4E-BP1 phosphorylation, accompanied by an increase in global protein synthesis.  
411 Considering emerging evidence of the functional association of translational machinery with the  
412 centrosome, our finding raises the possibility that the cilium-centrosome axis is involved in  
413 signaling between G2/M transcriptional programs and selective translation of 4E-BP1-dependent  
414 transcripts.

415 Our data shows that cells lacking cilia enter an alternate state of quiescence, characterized  
416 by a shift in transcriptional profile, as well as reduced ability to return to the cell cycle. These  
417 observations suggest that the primary cilium may also act as a transducer for quiescence signals  
418 and that the cilium-mediated establishment of the quiescence program is necessary for  
419 subsequent cell cycle re-entry and self-renewal. Disruption of primary ciliogenesis leads to a  
420 specific alteration of G2/M transcriptional networks in conditions of quiescence, suggesting a  
421 novel role for the control of mitotic progression by the cilium-centrosome axis. The observed  
422 halt at G2 in cilium-ablated cells indicates the requirement of signals in addition to the canonical  
423 G2/M transcriptome for transition through mitosis, such as mechanical cues, which may in turn  
424 also be sensed, transduced and regulated by the cilium/centrosome. While there is some evidence  
425 to support such non-ciliary roles for ciliary and centrosome proteins (Delaval et al., 2011;  
426 Jonassen et al., 2008; Kodani et al., 2013; Shang et al., 2012; Velásquez et al., 2016), our  
427 findings may also suggest that retention of the centrosome as a basal body is monitored, and that  
428 complete dismantling of the cilium/basal body complex is required for the G2/M transition.

061119

429 Taken together, our results show that primary cilia are dynamically assembled when  
430 myoblasts receive cues for cell cycle exit, and strongly support the idea that the cilium is integral  
431 to the establishment of the quiescent state in skeletal muscle myoblasts, while also distinguishing  
432 reversible from irreversible arrest. The functions of the cilium in quiescence are mediated in part  
433 through the dampening of proliferative signaling, and suppression of cell cycle progression by  
434 influencing G2/M control mechanisms.

435

## 436 **Materials and Methods**

### 437 **Cell culture**

438 C2C12 myoblasts were obtained originally from H. Blau, Stanford University and a sub-  
439 clone A2 was derived in-house (Sachidanandan et al, 2002) and used for all experiments.  
440 Myoblasts were maintained in growth medium (GM; DMEM + 20% Fetal Bovine Serum (FBS)  
441 and antibiotics), ensuring that cells do not exceed 70-80% confluence before passaging.  
442 Differentiation was induced in low mitogen medium (DM: DMEM + 2% horse serum), for 5  
443 days to form mature myotubes (MT). Synchronization in quiescence (G0) was induced by  
444 suspension culture of myoblasts for 48 hours in 1.3% methylcellulose medium prepared with  
445 DMEM containing 20% FBS, 10 mM HEPES, and antibiotics, as described (Sachidanandan et  
446 al., 2002). G0 cells were reactivated into the cell cycle by re-plating at a sub-confluent density in  
447 GM and harvested at defined times (30 minutes - 24hr) after activation.

448

### 449 **Immunofluorescence analysis and microscopy**

#### 450 *C2C12 cells*

451 Cells that were either plated on coverslips, or harvested from suspension cultures were  
452 simultaneously fixed and permeabilized in 2% PFA, 0.2% Triton X-100 in modified cytoskeletal  
453 buffer (CSK) (Gopinath et al., 2007) at 4°C for 15 min, to ensure detection of stable  
454 microtubules of the ciliary axoneme and depolymerization of dynamic cytoplasmic microtubules.  
455 Cells were incubated in blocking buffer (either 10% FCS, 0.2% Triton X-100 in CSK buffer or  
456 5% BSA, 0.2% Triton X-100 in CSK buffer) for 1 hour to reduce non-specific labeling. Primary  
457 antibodies were diluted in blocking buffer. Specific antibody labeling was detected using  
458 fluorescence tagged secondary antibodies from Invitrogen. Details of primary antibodies used are  
459 as follows: Acetylated tubulin (SIGMA, T7451, 1:5000), Gamma tubulin (SIGMA, T6557,

061119

460 1:1000), Acetylated tubulin (Abcam, ab125356, 1:1000), Ki67 (Abcam, ab1667, 1:200),  
461 Myogenin (Santa Cruz, sc-576, 1:100), Pax7 (AVIVA, ARP32742\_P050, 1:1000), Pax7 (DSHB,  
462 1:20), Pericentrin (Santa Cruz, sc-28147, 1:100). All washes were done in CSK buffer at RT. For  
463 suspension culture samples, immunostaining was performed as described earlier (Arora et al.,  
464 2017). Samples were mounted in aqueous mounting agents with DAPI. Images were obtained  
465 using either the Leica TCS.SP5-II AOBS, Leica TCS SP8 or Zeiss LSM 700 confocal  
466 microscopes. Minimum global changes in brightness or contrast were made, and composites  
467 were assembled using Fiji (ImageJ).

#### 468 *Single muscle fiber analysis*

469 Animal work was conducted in the NCBS/inStem Animal Care and Resource Center. All  
470 procedures were approved by the inStem Institutional Animal Ethics Committees following  
471 norms specified by the Committee for the Purpose of Control and Supervision of Experiments on  
472 Animals, Govt. of India.

473 Single skeletal muscle fibers were isolated using a technique modified from (Shefer and  
474 Yablonka-Reuveni, 2005; Siegel et al., 2009). Briefly, the Extensor Digitorum Longus (EDL)  
475 muscle of 6-week old male C57 BL/7 mice was dissected out and treated with Collagenase Type  
476 1 (Cat# LS4196 Worthington 400U/ml final concentration) for 1 hour at 37°C. The resultant  
477 dissociated muscle fibers were transferred into fresh DMEM and triturated to release individual  
478 muscle fibers, which were then washed through transfer to fresh medium, and then fixed with  
479 4% paraformaldehyde for 15 min at RT. For immunostaining, single fibers were washed with  
480 PBS twice and mounted on charged slides (Cat#12-550-15, Fisher Scientific). The fibers were  
481 permeabilized with 0.5% Tween 20 in PBS for 1 hour at RT followed by blocking with 2 mg/ml  
482 BSA in PBS, for 1 hour at RT. Primary antibody incubations were performed overnight at 4°C.  
483 Secondary antibody incubations were for 1 hour at RT using fluorescently tagged antibodies  
484 from Invitrogen. All antibody dilutions were made in a solution of 1 mg/ml BSA in 0.25%  
485 Tween 20 in PBS. Antibody incubations were followed by three washes with blocking solution.  
486 4', 6-Diamidino-2-Phenylindole (DAPI) (Cat# 32670 Sigma) was used to stain the DNA. Images  
487 were acquired using Zeiss LSM 510 Meta confocal microscope.

488

#### 489 **Western blot analysis**

490 Lysates of adherent cultures or suspension cells were obtained after harvesting PBS washed cells

061119

491 by centrifugation, and resuspended in Laemmli sample buffer (2% SDS, 5%  $\beta$ -mercaptoethanol,  
492 50 mM Tris-Cl pH 6.8) supplemented with Protease Inhibitor Cocktail and PhosStop (Roche) for  
493 isolation of total cellular protein. Protein amount in lysates was estimated using Amido Black  
494 staining and quantification of absorbance at 630 nm. Proteins were resolved on 8-12%  
495 Acrylamide gels, and transferred to PVDF membranes. The membrane was washed in 1X TBS  
496 with 0.1% Tween20 (TBST) and blocked in 5% blocking reagent (5% w/v nonfat milk in TBST)  
497 for 1 hour at room temperature, followed by incubation with primary antibody overnight at 4°C,  
498 then washed in 1X TBS + 0.1% Tween for 10 mins each followed by incubation with secondary  
499 antibody conjugated with HRP (Horse radish peroxidase) for 1 hour. After a brief wash with  
500 TBS-T for 10 minutes, ECL western blotting detection reagent for HRP was used for  
501 chemiluminescent detection using the ChemiCapt (Vilber Lourmat) gel documentation system.  
502 Details of antibodies used in this study are as follows: Cyclin A2 (Abcam, ab7956, 1:500),  
503 Cyclin B1 (Abcam, ab52187, 1:500), Cyclin D1 (Abcam, ab40754, 1:200), Cyclin E1 (Abcam,  
504 ab3927, 1:200), IFT88 (Proteintech, 13967-1-AP, 1:1000), p130 (Santa Cruz, SC-317, 1:200),  
505 p27 (BD, 610242, 1:2000), p21 (BD, 556430, 1:2000), MyoD (DAKO, M3512, 1:500), GAPDH  
506 (Abcam, ab9484, 1:2000), Myogenin (Santa Cruz, SC-12732, 1:1000), Active-Beta Catenin  
507 (Millipore, 05-665, 1:2000), Total-Beta Catenin (BD, 610153, 1:2000), PDGFR-alpha (Santa  
508 Cruz, SC-338, 1:500), Hes1 (Abcam, ab71559, 1:500), Phospho - mTOR (CST, 2971, 1:1000),  
509 Total - mTOR (CST, 2972, 1:2000), Phospho - rpS6 (CST, 4858, 1:1000), Total - rpS6 (CST,  
510 2217, 1:2000), Phospho-4E-BP1 (Thr37/46) (CST, 2855, 1:1000), Total 4EBP1 (53H11) (CST,  
511 9644, 1:1000), Phospho-IGF-I Receptor  $\beta$  (Tyr1135) (CST, 3918p, 1:1000), IGF-I Receptor  $\beta$   
512 (CST, 9750p, 1:1000).

513

#### 514 **Cell cycle analysis**

515 Adherent cells were trypsinized, washed in PBS and pelleted by centrifugation.  
516 Suspension-arrested cells were recovered from methylcellulose by dilution with PBS followed  
517 by centrifugation as described earlier. Cell pellets were dispersed in 0.75 ml of PBS, and fixed  
518 by drop wise addition into 80% ice-cold ethanol with gentle stirring, following which they were  
519 briefly washed with PBS and resuspended in PBS with 40  $\mu$ M of the DNA dye DRAQ5<sup>TM</sup> (Cat.  
520 No DR50050, Biostatus) per 10<sup>6</sup> cells. Cell cycle analysis was performed on a FACS Caliber®  
521 Cytometer (Becton Dickenson) using CelQuest® software and analyzed using FlowJo®



061119

522 software. At least 10,000 cells were acquired for each sample. Forward scatter and side scatter  
523 were used to gate cell populations and doublets were removed from analysis.

524

### 525 **Analysis of p27 levels**

526 A stable C2C12 line expressing a p27 sensor (p27-mVenus, a fusion protein consisting of  
527 mVenus and a defective mutant of p27-CDKI, (p27K(-)) (Oki et al., 2014) was generated,  
528 transfected with either control or IFT88 siRNAs, and placed in suspension arrest. After recovery  
529 from methyl cellulose medium, these cells were assayed for proportion of mVenus positive cells  
530 by flow cytometry using a FACS Caliber cytometer (Becton Dickinson). CelQuest® software  
531 was used for acquisition and FlowJo® software was used to analyze the data.

532

### 533 **EdU incorporation Assay**

534 Cells to be analyzed for DNA synthesis were pulsed with 10  $\mu$ M EdU for 30 minutes,  
535 washed in PBS and fixed as described earlier. Samples were stored in PBS at 4°C till further  
536 processing. For staining, cells were permeabilized and blocked in PBS having 10% FBS and  
537 0.5% TX-100 and labeling was detected using Click-iT® imaging kit (Invitrogen) as per  
538 manufacturer's instructions. Samples were mounted in aqueous mounting agents with DAPI.  
539 Images were obtained using the Leica TCS SP8 confocal microscope. Minimum global changes  
540 in brightness or contrast were made, and composites were assembled using Fiji (ImageJ).

541

### 542 **OPP incorporation Assay**

543 Cells to be analyzed for protein synthesis were pulsed with 20 $\mu$ M OPP for 30 minutes,  
544 washed in PBS and fixed as described earlier. Samples were stored in PBS at 4°C till further  
545 processing. For staining, cells were permeabilized and blocked in PBS having 10% FBS and  
546 0.5% TX-100 and labeling was detected using Click-iT® imaging kit (Invitrogen) as per  
547 manufacturer's instructions. Samples were mounted in aqueous mounting agents with DAPI.  
548 Images were obtained using the Leica TCS SP8 confocal microscope. Image intensity was  
549 calculated using Fiji (ImageJ) software, and corrected mean intensity (CMI = total intensity of  
550 signal – (area of signal  $\times$  mean background signal)) was determined.

551

### 552 **Knockdown of gene expression using siRNA**



061119

553 C2C12 cells were cultured in growth medium until 80% confluent. The cells were then  
554 trypsinized and plated on to tissue culture dishes at appropriate cell density according to size of  
555 the dish. Approximately 16 hours post plating, the cells were transfected with siRNA) using  
556 Lipofectamine RNAiMAX (Invitrogen) as per manufacturer's instructions. The cells were  
557 incubated with the RNA-Lipid complex for at least 18-24 hours following which they were used  
558 for further experimental analysis. Typically, siRNA-mediated knockdown was in the range of  
559 50- 90% at RNA level. Details of siRNA used in this study are as follows. For IFT88  
560 knockdown: 5'-GCUGUGAACUCGGAUAGAU-3' (Eurogentec) or siGENOME Mouse Ift88  
561 (21821) siRNA-SMARTpool (Dharmacon, M-050417-00-0010); For Control: Scrambled siRNA  
562 (Eurogentec SR-NP001-001) or siGENOME Non- Targeting Pool #1 (Dharmacon, D-00126-13-  
563 20)

564

### 565 **Isolation of RNA from cultured cells and Quantitative real-time RT-PCR**

566 RNA was isolated from cells using Trizol® (Invitrogen) according to manufacturer's  
567 instructions, dissolved in nuclease-free water, quality checked by agarose gel electrophoresis and  
568 quantitated by spectrophotometry using the NanoDrop ND-1000UV-Vis spectrophotometer  
569 (NanoDrop Technologies, Wilmington, DE). cDNA was prepared from 1 µg total RNA using  
570 Superscript III (Invitrogen) and used in SYBR-Green (Applied Biosystems) based quantitative  
571 real time PCR analysis performed on an ABI 7900HT thermal cycler (Applied Biosystems)  
572 normalized to GAPDH levels. Fold change was calculated using normalized cycle threshold  
573 value differences  $2^{-\Delta\Delta ct}$ . Primer sequences used in this study are as follows: GAPDH: forward 5'-  
574 AATGTGTCCTCGTGGATCTGA -3', reverse, 5'-GATGCCTGCTTACCACCTTCT -3';  
575 IFT88: forward, 5'-ATGTGGAGCTGGCCAACGACCT-3', reverse, 5'-  
576 TGGTCGCAGCTGCACTCTTCACT-3'; FEZ1: forward, 5'-TGTA CTTCGGTGCCAGGATG -  
577 3', reverse, 5'-GAGAGGGAAGGGTCCTCCAG-3'; PDGFR $\alpha$ : forward, 5'-  
578 GGTGGCCTGGACGAACAGAG-3', reverse, 5'-GGAACCTGTCTCGATGGCACTC-3';  
579 YPEL3: forward, 5'-TGCGGGCCAGCAGAAGAGCG-3', reverse, 5'-  
580 GGAGCTAGGTCAGTCCCAGCCGT-3'; YPEL5: forward, 5'-  
581 GGCGCCACTGGTAGAGCATT-3', reverse, 5'-CAGGATCACACGGCCTTCCT-3';  
582 AURKA: forward, 5'-CGGTGCATGCTCCATCTTCC-3', reverse, 5'-  
583 CTTCTCGTCATGCATCCGGC-3'; Cdc20: forward, 5'-CCGGCACATTCGCATTTGGA-3',

061119

584 reverse, 5'-GTTCTGGGCAAAGCCGTGAC-3'; CenpF: forward, 5'-  
585 CAGCTGGTGGCAGCAGATCA-3', reverse, 5'-GCTGGGAGTTCTTGAAGGC-3'; Bub1:  
586 forward, 5'-TGCTCAGTAACAAGCCATGGAAC-3', reverse, 5'-  
587 CCTTCAGGTTTCCAGACTCCTCC-3'; FoxM1: forward, 5'-  
588 ACTTTAAGCACATTGCCAAGCCA-3', reverse, 5'-TGGCACTTGGGTGAATGGTCC-3';  
589 Ki67: forward, 5'-TGGAAGAGCAGGTTAGCACTGT-3', reverse, 5'-  
590 CAAACTTGGGCCTTGGCTGT-3', Mcm3: forward, 5'-CCAGGACTCCCAGAAAGTGGA-  
591 3', reverse, 5'-TGGAACACTTCTAAGAGGGCCG-3'; Mcm5: forward, 5'-  
592 TCAAGCGCCGTTTTGCCATT-3', reverse, 5'-CTCACCCCTGCGTAGCATGA-3'; Plk4:  
593 forward, 5'-GAAGGACTTGGCCACACAGC-3', reverse, 5'-GAACCCACACAGCTCCGCTA  
594 -3'.

595

### 596 **Global transcription profiling using microarray**

597 1 µg of total RNA isolated from Control or IFT88 KD cells was converted to cDNA using  
598 One-cycle labeling kit and amplified using IVT labeling kit following manufacturer's instructions  
599 (Affymetrix). The normalized cRNA was fragmented, hybridized to mouse Affymetrix Gene-  
600 chips (430A 2.0), washed, stained and scanned as per Affymetrix protocols. The experiment was  
601 repeated with three different biological replicates and data analyzed using Affymetrix Gene Chip  
602 operating software (GCOS). All the CEL (cell intensity) files generated by Expression Console  
603 were then loaded into the R Bioconductor "affy" package for microarray analysis (Gautier et al.,  
604 2004). Briefly, the CEL files were normalized using Loess Normalization before proceeding to  
605 further analysis of differential expression between Control and IFT88KD samples for each  
606 specific cell state. Genes showing >1.5-fold differential expression with  $P \leq 0.05$  were selected  
607 and a subset validated by real time Q-RT-PCR. The raw data is available on the GEO database  
608 (Series GSE110742).

609

### 610 **Analysis of microarray data**

611 *STRING analysis:* The lists of genes that were either up-regulated or down-regulated in  
612 IFT88KD myoblasts under G0 conditions were used as input to search for networks in the  
613 STRING database using default settings with only connected nodes being represented in the  
614 network diagram.

061119

615 *GSEA*: Normalized expression values for Control (SCR) and IFT88KD were used as input  
616 dataset and the gene sets used were those from the C5 collection and those related to signaling,  
617 which are available on the Molecular Signatures Database (MSigDB), as well as a gene set  
618 identified from earlier published datasets (pSig) (Venezia et al., 2004). The enrichment analysis  
619 was carried out as described in the *GSEA* User guide  
620 (<http://software.broadinstitute.org/gsea/doc/GSEAUserGuideFrame.html>).

621

### 622 **Luciferase reporter assays for testing Wnt pathway activity**

623 All assays were performed as described on stable clones expressing either the Super8X-  
624 TOP-flash (TCF site) construct (Veeman et al., 2003)(Veeman et al., 2003), TFC-1, or the FOP-  
625 flash (mutated TCF site) construct (Veeman et al., 2003), FFC-15. TFC-1 and FFC-15 clones  
626 were derived earlier (Aloysius et al., 2018; Subramaniam et al., 2013).

627 Luciferase activity was measured in lysates of TFC-1 and FFC-15 cells that were  
628 transfected with either IFT88 or negative control siRNAs. Assays were performed using the  
629 Luciferase Reporter Gene Assay Kit (Roche) to obtain data as relative light units (RLU). TCF  
630 activity was finally expressed as an Arbitrary Unit (AU), which was obtained after normalizing  
631 RLU to total protein estimated using BCA kit (Pierce).

632

### 633 **Statistical Analysis**

634 Unless otherwise mentioned, all data represented are values derived from at least 3 biological  
635 replicates and is represented as mean  $\pm$  s.e.m, analyzed using Student's t-test, where  $p < 0.05$  was  
636 taken as significant.

637

### 638 **Acknowledgements**

639 We thank Jay Gopalakrishnan (Cologne) and Krishanu Ray (TIFR), for helpful discussions, and  
640 Pavithra Chavali and Puja Singh for critical reading of the manuscript. We gratefully  
641 acknowledge Nandini Rangaraj (CCMB Advanced Imaging Facility), M.B. Madhavi (CCMB  
642 Microarray Facility), and CIFF at the Bangalore Life Sciences Cluster for imaging facilities.

643 Author contributions: N.V. and J.D. designed experiments, interpreted data and wrote the  
644 manuscript; N.V., A.G. H.G., A.A., and N. Vyas performed experiments.

645

061119

646 **Competing interests**

647 No competing interests declared

648

649 **Funding**

650 N.V. was supported by a Government of India Department of Biotechnology (DBT) graduate  
651 fellowship; H.G., A.G., and A.A. were supported by graduate fellowships from the Council for  
652 Scientific and Industrial Research. N.V. was also supported by a travel fellowship from DBT and  
653 the Indian Council of Medical Research (ICMR). This research was supported by core funds to  
654 CCMB from CSIR, core funds to InStem from DBT, and an Indo-Australia collaborative grant  
655 from DBT/Australia India Strategic Fund and an Indo-Danish collaborative grant to J.D. from  
656 DBT/Danish Innovation Fund.

657

658 **Data availability**

659 The raw data for the microarray analysis is available on the GEO database (Series GSE110742).

660

661 **References**

- 662 **Abou-Khalil, R., Grand, F. L. and Chazaud, B.** (2013). Human and Murine Skeletal Muscle  
663 Reserve Cells. In *Stem Cell Niche*, pp. 165–177. Humana Press, Totowa, NJ.
- 664 **Aloysius, A., DasGupta, R. and Dhawan, J.** (2018). The transcription factor Lef1 switches  
665 partners from  $\beta$ -catenin to Smad3 during muscle stem cell quiescence. *Sci Signal* **11**, ean3000.
- 666 **Arora, R., Rumman, M., Venugopal, N., Gala, H. and Dhawan, J.** (2017). Mimicking Muscle  
667 Stem Cell Quiescence in Culture: Methods for Synchronization in Reversible Arrest. In *Muscle*  
668 *Stem Cells*, pp. 283–302. Humana Press, New York, NY.
- 669 **Basten, S. G. and Giles, R. H.** (2013). Functional aspects of primary cilia in signaling, cell  
670 cycle and tumorigenesis. *Cilia* **2**, 6.
- 671 **Blau, H. M., Chiu, C.-P. and Webster, C.** (1983). Cytoplasmic activation of human nuclear  
672 genes in stable heterocaryons. *Cell* **32**, 1171–1180.
- 673 **Cheung, T. H. and Rando, T. A.** (2013). Molecular regulation of stem cell quiescence. *Nat.*  
674 *Rev. Mol. Cell Biol.* **14**, 329–340.
- 675 **Coller, H. A., Sang, L. and Roberts, J. M.** (2006). A New Description of Cellular Quiescence.  
676 *PLoS Biol.* **4**, e83.
- 677 **Collins, C. A., Olsen, I., Zammit, P. S., Heslop, L., Petrie, A., Partridge, T. A. and Morgan,**  
678 **J. E.** (2005). Stem Cell Function, Self-Renewal, and Behavioral Heterogeneity of Cells from the  
679 Adult Muscle Satellite Cell Niche. *Cell* **122**, 289–301.
- 680 **Delaval, B., Bright, A., Lawson, N. D. and Doxsey, S.** (2011). The cilia protein IFT88 is  
681 required for spindle orientation in mitosis. *Nat. Cell Biol.* **13**, 461.
- 682 **Dhawan, J. and Helfman, D. M.** (2004). Modulation of acto-myosin contractility in skeletal  
683 muscle myoblasts uncouples growth arrest from differentiation. *J. Cell Sci.* **117**, 3735.

061119

- 684 **Fingar, D. C. and Blenis, J.** (2004). Target of rapamycin (TOR): an integrator of nutrient and  
685 growth factor signals and coordinator of cell growth and cell cycle progression. *Oncogene* **23**,  
686 3151–3171.
- 687 **Fu, W., Asp, P., Canter, B. and Dynlacht, B. D.** (2014). Primary cilia control hedgehog  
688 signaling during muscle differentiation and are deregulated in rhabdomyosarcoma. *Proc. Natl.*  
689 *Acad. Sci.* **111**, 9151–9156.
- 690 **Gautier, L., Cope, L., Bolstad, B. M. and Irizarry, R. A.** (2004). affy—analysis of Affymetrix  
691 GeneChip data at the probe level. *Bioinformatics* **20**, 307–315.
- 692 **Gopinath, S. D., Narumiya, S. and Dhawan, J.** (2007). The RhoA effector mDiaphanous  
693 regulates MyoD expression and cell cycle progression via SRF-dependent and SRF-independent  
694 pathways. *J. Cell Sci.* **120**, 3086–3098.
- 695 **Goto, H., Inoko, A. and Inagaki, M.** (2013). Cell cycle progression by the repression of  
696 primary cilia formation in proliferating cells. *Cell. Mol. Life Sci.* **70**, 3893–3905.
- 697 **Goto, H., Inaba, H. and Inagaki, M.** (2017). Mechanisms of ciliogenesis suppression in  
698 dividing cells. *Cell. Mol. Life Sci.* **74**, 881–890.
- 699 **Hao, L. and Scholey, J. M.** (2009). Intraflagellar transport at a glance. *J. Cell Sci.* **122**, 889–  
700 892.
- 701 **Hildebrandt, F., Benzing, T. and Katsanis, N.** (2011). Ciliopathies. *N. Engl. J. Med.* **364**,  
702 1533–1543.
- 703 **Hirokawa, N., Tanaka, Y., Okada, Y. and Takeda, S.** (2006). Nodal Flow and the Generation  
704 of Left-Right Asymmetry. *Cell* **125**, 33–45.
- 705 **Hulsen, T., de Vlieg, J. and Alkema, W.** (2008). BioVenn – a web application for the  
706 comparison and visualization of biological lists using area-proportional Venn diagrams. *BMC*  
707 *Genomics* **9**, 488.
- 708 **Jaafar Marican, N. H., Cruz-Migoni, S. B. and Borycki, A.-G.** (2016). Asymmetric  
709 Distribution of Primary Cilia Allocates Satellite Cells for Self-Renewal. *Stem Cell Rep.* **6**, 798–  
710 805.
- 711 **Jackman, M., Lindon, C., Nigg, E. A. and Pines, J.** (2003). Active cyclin B1–Cdk1 first  
712 appears on centrosomes in prophase. *Nat. Cell Biol.* **5**, 143.
- 713 **Jonassen, J. A., San Agustin, J., Follit, J. A. and Pazour, G. J.** (2008). Deletion of IFT20 in  
714 the mouse kidney causes misorientation of the mitotic spindle and cystic kidney disease. *J. Cell*  
715 *Biol.* **183**, 377–384.
- 716 **Kim, J., Lee, J. E., Heynen-Genel, S., Suyama, E., Ono, K., Lee, K., Ideker, T., Aza-Blanc,**  
717 **P. and Gleeson, J. G.** (2010). Functional genomic screen for modulators of ciliogenesis and  
718 cilium length. *Nature* **464**, 1048.
- 719 **Kim, S., Zaghoul, N. A., Bubenshchikova, E., Oh, E. C., Rankin, S., Katsanis, N., Obara,**  
720 **T. and Tsiokas, L.** (2011). Ndel-mediated inhibition of ciliogenesis affects cell cycle re-entry.  
721 *Nat. Cell Biol.* **13**, 351–360.
- 722 **Kodani, A., Salomé Sirerol-Piquer, M., Seol, A., Manuel Garcia-Verdugo, J. and Reiter, J.**  
723 **F.** (2013). Kif3a interacts with Dynactin subunit p150Glued to organize centriole subdistal  
724 appendages. *EMBO J.* **32**, 597–607.
- 725 **Mauro, A.** (1961). Satellite Cell of Skeletal Muscle Fibers. *J. Cell Biol.* **9**, 493–495.
- 726 **McClintock, T. S., Glasser, C. E., Bose, S. C. and Bergman, D. A.** (2008). Tissue expression  
727 patterns identify mouse cilia genes. *Physiol. Genomics* **32**, 198–206.
- 728 **Metsalu, T. and Vilo, J.** (2015). ClustVis: a web tool for visualizing clustering of multivariate  
729 data using Principal Component Analysis and heatmap. *Nucleic Acids Res.* **43**, W566–W570.



061119

- 730 **Milasincic, D. J., Dhawan, J. and Farmer, S. R.** (1996). Anchorage-dependent control of  
731 muscle-specific gene expression in C<sub>2</sub>C<sub>12</sub>  
732 mouse myoblasts. *Vitro Cell. Dev. Biol. - Anim.* **32**, 90–99.
- 733 **Mootha, V. K., Lindgren, C. M., Eriksson, K.-F., Subramanian, A., Sihag, S., Lehar, J.,**  
734 **Puigserver, P., Carlsson, E., Ridderstråle, M., Laurila, E., et al.** (2003). PGC-1 $\alpha$ -responsive  
735 genes involved in oxidative phosphorylation are coordinately downregulated in human diabetes.  
736 *Nat. Genet.* **34**, 267.
- 737 **Morgan, J. E. and Partridge, T. A.** (2003). Muscle satellite cells. *Int. J. Biochem. Cell Biol.* **35**,  
738 1151–1156.
- 739 **Oki, T., Nishimura, K., Kitaura, J., Togami, K., Maehara, A., Izawa, K., Sakaue-Sawano,**  
740 **A., Niida, A., Miyano, S., Aburatani, H., et al.** (2014). A novel cell-cycle-indicator, mVenus-  
741 p27K<sup>-</sup>, identifies quiescent cells and visualizes G0–G1 transition. *Sci. Rep.* **4**, 4012.
- 742 **Pan, J., Seeger-Nukpezah, T. and Golemis, E. A.** (2013). The role of the cilium in normal and  
743 abnormal cell cycles: emphasis on renal cystic pathologies. *Cell. Mol. Life Sci.* **70**, 1849–1874.
- 744 **Paridaen, J. T. M. L., Wilsch-Bräuninger, M. and Huttner, W. B.** (2013). Asymmetric  
745 Inheritance of Centrosome-Associated Primary Cilium Membrane Directs Ciliogenesis after Cell  
746 Division. *Cell* **155**, 333–344.
- 747 **Pollard, H. J., Willett, M. and Morley, S. J.** (2014). mTOR kinase-dependent, but raptor-  
748 independent regulation of downstream signaling is important for cell cycle exit and myogenic  
749 differentiation. *Cell Cycle* **13**, 2517–2525.
- 750 **Riparbelli, M. G., Callaini, G. and Megraw, T. L.** (2012). Assembly and Persistence of  
751 Primary Cilia in Dividing Drosophila Spermatocytes. *Dev. Cell* **23**, 425–432.
- 752 **Robert, A., Margall-Ducos, G., Guidotti, J.-E., Brégerie, O., Celati, C., Bréchet, C. and**  
753 **Desdouets, C.** (2007). The intraflagellar transport component IFT88/polaris is a centrosomal  
754 protein regulating G1-S transition in non-ciliated cells. *J Cell Sci* **120**, 628–637.
- 755 **Rumman, M., Dhawan, J. and Kassem, M.** (2015). Concise Review: Quiescence in Adult  
756 Stem Cells: Biological Significance and Relevance to Tissue Regeneration. *STEM CELLS* **33**,  
757 2903–2912.
- 758 **Rumman, M., Majumder, A., Harkness, L., Venugopal, B., Vinay, M. B., Pillai, M. S.,**  
759 **Kassem, M. and Dhawan, J.** (2018). Induction of quiescence (G0) in bone marrow stromal  
760 stem cells enhances their stem cell characteristics. *Stem Cell Res.* **30**, 69–80.
- 761 **Sachidanandan, C., Sambasivan, R. and Dhawan, J.** (2002). Tristetraprolin and LPS-  
762 inducible CXC chemokine are rapidly induced in presumptive satellite cells in response to  
763 skeletal muscle injury. *J. Cell Sci.* **115**, 2701.
- 764 **Schneider, L., Clement, C. A., Teilmann, S. C., Pazour, G. J., Hoffmann, E. K., Satir, P.**  
765 **and Christensen, S. T.** (2005). PDGFR $\alpha$  Signaling Is Regulated through the Primary Cilium in  
766 Fibroblasts. *Curr. Biol.* **15**, 1861–1866.
- 767 **Shang, Z.-F., Yu, L., Li, B., Tu, W.-Z., Wang, Y., Liu, X.-D., Guan, H., Huang, B., Rang,**  
768 **W.-Q. and Zhou, P.-K.** (2012). 4E-BP1 participates in maintaining spindle integrity and  
769 genomic stability via interacting with PLK1. *Cell Cycle* **11**, 3463–3471.
- 770 **Shefer, G. and Yablonka-Reuveni, Z.** (2005). Isolation and Culture of Skeletal Muscle  
771 Myofibers as a Means to Analyze Satellite Cells. *Methods Mol. Biol. Clifton NJ* **290**, 281–304.
- 772 **Showkat, M., Beigh, M. A. and Andrabi, K. I.** (2014). mTOR Signaling in Protein Translation  
773 Regulation: Implications in Cancer Genesis and Therapeutic Interventions. *Mol. Biol. Int.* **2014**,  
774 1–14.

061119

- 775 **Siegel, A. L., Atchison, K., Fisher, K. E., Davis, G. E. and Cornelison, D. d. w.** (2009). 3D  
776 Timelapse Analysis of Muscle Satellite Cell Motility. *STEM CELLS* **27**, 2527–2538.
- 777 **Singla, V. and Reiter, J. F.** (2006). The Primary Cilium as the Cell's Antenna: Signaling at a  
778 Sensory Organelle. *Science* **313**, 629–633.
- 779 **Spalluto, C., Wilson, D. I. and Hearn, T.** (2013). Evidence for reciliation of RPE1 cells in late  
780 G1 phase, and ciliary localisation of cyclin B1. *FEBS Open Bio* **3**, 334–340.
- 781 **Subramaniam, S., Sreenivas, P., Cheedipudi, S., Reddy, V. R., Shashidhara, L. S.,**  
782 **Chilukoti, R. K., Mylavaram, M. and Dhawan, J.** (2013). Distinct Transcriptional Networks  
783 in Quiescent Myoblasts: A Role for Wnt Signaling in Reversible vs. Irreversible Arrest. *PLoS*  
784 *ONE* **8**, e65097.
- 785 **Subramanian, A., Tamayo, P., Mootha, V. K., Mukherjee, S., Ebert, B. L., Gillette, M. A.,**  
786 **Paulovich, A., Pomeroy, S. L., Golub, T. R., Lander, E. S., et al.** (2005). Gene set enrichment  
787 analysis: A knowledge-based approach for interpreting genome-wide expression profiles. *Proc.*  
788 *Natl. Acad. Sci.* **102**, 15545–15550.
- 789 **Szklarczyk, D., Franceschini, A., Wyder, S., Forslund, K., Heller, D., Huerta-Cepas, J.,**  
790 **Simonovic, M., Roth, A., Santos, A., Tsafou, K. P., et al.** (2015). STRING v10: protein-protein  
791 interaction networks, integrated over the tree of life. *Nucleic Acids Res.* **43**, D447–452.
- 792 **Veeman, M. T., Slusarski, D. C., Kaykas, A., Louie, S. H. and Moon, R. T.** (2003). Zebrafish  
793 prickle, a modulator of noncanonical Wnt/Fz signaling, regulates gastrulation movements. *Curr.*  
794 *Biol. CB* **13**, 680–685.
- 795 **Velásquez, C., Cheng, E., Shuda, M., Lee-Oesterreich, P. J., Pogge von Strandmann, L.,**  
796 **Gritsenko, M. A., Jacobs, J. M., Moore, P. S. and Chang, Y.** (2016). Mitotic protein kinase  
797 CDK1 phosphorylation of mRNA translation regulator 4E-BP1 Ser83 may contribute to cell  
798 transformation. *Proc. Natl. Acad. Sci.* **113**, 8466–8471.
- 799 **Venezia, T. A., Merchant, A. A., Ramos, C. A., Whitehouse, N. L., Young, A. S., Shaw, C.**  
800 **A. and Goodell, M. A.** (2004). Molecular Signatures of Proliferation and Quiescence in  
801 Hematopoietic Stem Cells. *PLOS Biol.* **2**, e301.
- 802 **Walz, G.** (2017). Role of primary cilia in non-dividing and post-mitotic cells. *Cell Tissue Res.*  
803 **369**, 11–25.
- 804 **Wheway, G., Nazlamova, L. and Hancock, J. T.** (2018). Signaling through the Primary  
805 Cilium. *Front. Cell Dev. Biol.* **6**,.
- 806 **Yoder, B. K.** (2007). Role of Primary Cilia in the Pathogenesis of Polycystic Kidney Disease:  
807 Figure 1. *J. Am. Soc. Nephrol.* **18**, 1381–1388.
- 808 **Yoshida, N., Yoshida, S., Koishi, K., Masuda, K. and Nabeshima, Y.** (1998). Cell  
809 heterogeneity upon myogenic differentiation: down-regulation of MyoD and Myf-5 generates  
810 'reserve cells.' *J. Cell Sci.* **111**, 769–779.
- 811
- 812



061119

## 813 **Figure Legends**

### 814 **Fig. 1. Primary cilia are dynamically regulated and are preferentially present on quiescent** 815 **myoblasts *in vitro* and *in vivo***

- 816 A. Immuno-detection of primary cilia on C2C12 myoblasts in different cellular states -  
817 proliferating (MB), quiescent (G0), and 24 hours after reactivation into cell cycle from  
818 quiescence (R24). Antibodies against  $\gamma$ -tubulin ( $\gamma$ -tub) mark centrosome and Acetylated  
819 tubulin (Ac.Tub) mark cilia; DAPI was used to label DNA. While only a small proportion of  
820 MB is ciliated, G0 myoblasts show a higher frequency of ciliation, which is reversed at R24.  
821 Lower panel shows magnified views (boxed insets). (Scale bar, 10  $\mu$ m.)
- 822 B. Quantification of data showed in (A). Values are mean  $\pm$  s.e.m,  $N \geq 3$ , \*  $p < 0.05$
- 823 C. The length of cilia present on MB, G0, and R24 cultures was measured and the distribution  
824 plotted. Cilia elaborated by G0 myoblasts are longer (Average length 2.2  $\mu$ m) than those in  
825 proliferating cultures (Average length 1.8  $\mu$ m). The numbers of ciliated cells analyzed are  
826 MB (40), G0 (30), and R24 (54).
- 827 D. Increased frequency of ciliated cells observed as proliferating myoblasts withdraw into  
828 quiescence during a time course of suspension arrest (0-48 hours). Values are mean  $\pm$  s.e.m,  
829  $N \geq 3$ , \*  $p < 0.05$ , \*\*  $p < 0.01$ , \*\*\*  $p < 0.005$
- 830 E. Rapid loss of cilia during reactivation of G0 cells by re-plating on to an adhesive substratum,  
831 and gradual increase in ciliation during cell cycle re-entry. Values are mean  $\pm$  s.e.m,  $N=3$  \*  $p$   
832  $< 0.05$
- 833 F. Immunofluorescence analysis of cilia in 5 day differentiated culture of C2C12 cells: cilia are  
834 marked with Acetylated tubulin (Ac.Tub), Myogenin marks differentiated cells. DNA is  
835 labeled with DAPI. (Scale bar, 10  $\mu$ m). Cilia are absent on multinucleated myotubes (open  
836 arrowheads), and preferentially present on mononuclear (unfused) cells that lack Myogenin  
837 (closed arrowheads).
- 838 G. Quantitative analysis of ciliation during a time course of differentiation (represented by  
839 image in F) reveals increased proportion of ciliated cells as myoblasts fuse to form myotubes.  
840 Values are mean  $\pm$  s.e.m,  $N=3$ , \*  $p < 0.05$
- 841 H. Increased proportion of Myogenin<sup>+</sup> cells during the period where ciliation was analyzed in  
842 (G) highlights the time course of increase in Myogenin expression during differentiation.  
843 Values are mean  $\pm$  s.e.m,  $N=3$ , \*  $p < 0.05$

061119

844 I. Quantitative analysis of cells that are both ciliated and Myogenin<sup>+</sup> shows that ciliated cells  
845 are largely negative for Myogenin, indicating exclusion from differentiation. Values are  
846 mean  $\pm$  s.e.m, N=2

847 J. Primary cilia are present on 47% of reserve cells in differentiated cultures. 5-day  
848 differentiated C2C12 cultures were mildly trypsinised to remove myotubes, enriching the  
849 adherent undifferentiated mononuclear reserve cells. Cilia were detected using  $\gamma$ -tubulin ( $\gamma$   
850 tub) and Acetylated tubulin (Ac.Tub). (Scale bar, 10  $\mu$ m.)

851 K. Primary cilia are associated with 71.1% Pax7<sup>+</sup> satellite cells (SC) but not with Pax7<sup>-</sup>  
852 myonuclei (MN). Representative immunofluorescence image of a single fiber isolated from  
853 mouse EDL muscle and stained for Pax7 to mark satellite cells, and Pericentrin (PCNT) and  
854 Acetylated tubulin (Ac.Tub) to mark primary cilia. DAPI marks nuclei. (Scale bar, 10  $\mu$ m.)

855

856 **Fig. 2. Abrogation of primary cilia has distinct effects in proliferating and quiescent**  
857 **myoblasts.**

858 C2C12 myoblasts were transfected with siRNAs targeting IFT88 to block ciliogenesis, and were  
859 analyzed for effects of knockdown on proliferation and quiescence. Non-targeting siRNA was  
860 used as control.

861 A. qRT-PCR analysis was used to detect levels of IFT88 mRNA in control and siRNA treated  
862 samples. Knockdown myoblasts show reduced levels of IFT88 mRNA. Values represent  
863 values indicated are mean  $\pm$  s.e.m, N=3, \*\*p-value = 0.0062.

864 B. Western blotting analysis demonstrates efficient knockdown of respective target protein  
865 levels. Values represent values indicated are mean  $\pm$  s.e.m, N=3, \*\*\*p-value= 0.0004.

866 C. Primary cilia were visualized by immunofluorescence labeling of Acetylated tubulin (Ac.  
867 tubulin) in IFT88 knockdown myoblasts cultured in quiescence-inducing conditions.  
868 Representative immunofluorescence images are shown. A single cilium is present per cell in  
869 control cultures, whereas knockdown cells show greatly reduced cilia (accompanied by  
870 increased tubulin staining in the cell body).

871 D. Knockdown of IFT88 caused reduction in frequency of ciliated cells. Values represent mean  $\pm$   
872 s.e.m, N=4, \*\* p-value = 0.0034.

061119

- 873 E. Proliferation of cells was analyzed by quantification of Ki67<sup>+</sup> cells, detected by immuno-  
874 staining. Targeting ciliogenesis had little effect in proliferating conditions (MB). Values  
875 represent mean  $\pm$  s.e.m, N=3, ns = not significant (p-value = 0.959).
- 876 F. When induced to enter quiescence (G0), knockdown cells displayed increased frequency of  
877 Ki67<sup>+</sup> compared with control siRNA-transfected cells. Values represent mean  $\pm$  s.e.m, N=5,  
878 \*\* p-value = 0.0015.
- 879 G. Ablation of ciliogenesis suppresses expression of quiescence marker p27. C2C12 myoblasts  
880 stably expressing the p27 sensor (mVenus-p27K<sup>-</sup>) were transfected with siRNA targeting  
881 IFT88 or control siRNA and then cultured in quiescence-inducing conditions. The frequency  
882 of p27 (mVenus) positive cells was measured by flow cytometry. Values represent mean  $\pm$   
883 s.e.m, N=3, \* p-value = 0.0234.
- 884 H. Flow cytometric analysis of IFT88 siRNA-transfected cells cultured in conditions that allow  
885 proliferation (MB) does not show a significant shift in cell cycle profile. When placed in  
886 conditions that induce quiescence (G0) in control cells, knockdown cells display an increased  
887 proportion of cells in G2/M. Representative profiles are shown where the X axis shows the  
888 DNA content estimated by fluorescence intensity of the DNA dye DRAQ5, and the Y axis  
889 represents cell numbers as a percentage of maximum (normalized to mode).
- 890 I. Quantification of experiment described in (H) showing shifts in proportion of cells in different  
891 cell cycle stages (G1, S, G2/M). Values represent mean  $\pm$  s.e.m, N=3, \* p-value= 0.043.

892

893 **Fig. 3. IFT88 knockdown cells display an altered quiescence program enriched with G2/M**  
894 **signature pathways.**

895 Affymetrix array-based transcriptional profiling was performed on IFT88 siRNA and control  
896 siRNA transfected myoblasts at 3 different cell cycle states -proliferating (MB), quiescent (G0),  
897 and 2 hours after reactivation into cell cycle from G0 (R2).

- 898 A. Two dimensional Principal Component Analysis (PCA) plot (Metsalu and Vilo, 2015) of  
899 microarray data showing that IFT88KD G0 cells have a transcriptional profile that is  
900 distinct from Control G0 cells. Samples from different cell states can be seen as distinct  
901 clusters while the replicates of each sample cluster together indicating that they behave  
902 similarly. Control samples are shown as green dots and IFT88KD samples are shown as  
903 red dots. Note that control and knockdown cells do not show differences in the MB state,

061119

- 904 but are well separated in both G0 and R2 states, indicating a stage-specific requirement  
905 for the cilium.
- 906 B. Size adjusted Venn diagram (Hulsen et al., 2008) depicting the number of differentially  
907 expressed genes in MB, G0 and R2 states. IFT88KD cells showed the greatest deviation  
908 from Control (maximum number of altered genes) in G0.
- 909 C. STRING analysis was used to visualize the networks formed by the altered genes at G0.  
910 Genes up-regulated in IFT88KD cells displayed a strong interaction network, which  
911 comprised of three major clusters: (i) Cell cycle-related, (ii) Myogenic genes (iii) ECM-  
912 related. Disconnected nodes (genes) are not displayed.
- 913 D. GSEA was used to identify pathways of genes in the altered transcriptome of IFT88KD  
914 G0 myoblasts. The plots show enrichment of genes related to cell cycle and proliferation.  
915 The gene sets used as reference here are the 315 genes annotated in the GO term  
916 GO:0007049 (CELL CYCLE) and 338 genes identified and collated as a proliferation  
917 signature (pSig)
- 918 E. Gene sets with highest enrichment scores identified in GSEA are specific to G2/M  
919 phases. NES represents Normalized Enrichment Score.
- 920 F. IFT88KD cells show cell cycle exit kinetics similar to Control cells and do not participate  
921 in DNA synthesis (EdU incorporation, top panel) or mitosis (H3pS10, bottom panel),  
922 during a time course of suspension culture. Values represent mean  $\pm$  s.e.m, N=2.
- 923 G. Validation of microarray analysis: qRT PCR analysis was used to determine mRNA  
924 levels of selected G2/M genes identified as up-regulated in IFT88KD G0 cells at  
925 conditions of proliferation (MB) and quiescence (G0). The relative mRNA levels were  
926 calculated in comparison to MB for Control and IFT88KD cells. Control cells show a  
927 characteristic repression of expression of mitotic regulators in G0 (varying from 50 to  
928 500-fold reduction). Although IFT88KD G0 cells display higher expression levels than  
929 Control G0 cells, they still show lower expression of these proliferative genes when  
930 compared to cycling cells (MB) (varying from 10 to 50-fold lower). Values represent  
931 mean  $\pm$  s.e.m, N=3, \*  $p < 0.01$ , \*\*  $p < 0.001$ , \*\*\*  $p < 0.0001$

932  
933 **Fig. 4: The altered quiescent state in IFT88KD is characterized by reduced self-renewal,**  
934 **deregulated reactivation kinetics and enhanced activity of proliferative signaling pathways.**

061119

- 935 A. IFT88KD G0 myoblasts were harvested from suspension and replated at clonal density  
936 for analysis of colony forming potential (% CFU). IFT88KD myoblasts showed reduced  
937 self-renewal when compared to control cells. Values represent mean  $\pm$  s.e.m, N=4, \* $p$  =  
938 0.0068.
- 939 B. EdU incorporation was estimated during a time course of reactivation (6, 12, 24 hr) from  
940 quiescence (G0). Knockdown cells are able to return to the cell cycle, but at 24 hours  
941 when control cultures are restored to pre-suspension levels of DNA synthesis, IFT88KD  
942 cells showed significantly fewer cells in S phase. (Values represent mean  $\pm$  s.e.m, N=3,  
943 \* $p$ -value<0.05).
- 944 C-G Mitogenic signaling pathways are up-regulated by IFT88 knockdown.
- 945 C. Gene sets related to pathways that are enriched in the IFT88KD G0 myoblast  
946 transcriptome. IFT88KD G0 transcriptome shows enrichment for genes related to cell  
947 signaling.
- 948 D. Ablation of ciliogenesis results in increased expression of Wnt effector  $\beta$ -catenin.  
949 Immuno-blot (dephospho or active  $\beta$ -catenin) represents one of three independent  
950 experiments.
- 951 E. Functional analysis: IFT88KD G0 cells show elevated signaling through the Wnt  
952 pathway. Quantification of increased Wnt signaling as indicated by higher TOPFlash  
953 activity (expressed as RLU/  $\mu$ g protein). Values represent  $\pm$  s.e.m, N=2,  $p$ -value=0.014.
- 954 F. IFT88KD show elevated growth factor signaling in conditions of suspension arrest.  
955 Western blot analysis shows increased growth factor receptor protein expression for  
956 IGFR and PDGFRA, as well as increased activation of IGFR (p-IGFR).
- 957 G. Activation of selective arms of translation regulatory pathways: IFT88KD cells at G0  
958 conditions show elevated levels of phosphorylated (active) mTOR. However, there is  
959 divergent response in the key mTOR targets; while ribosomal protein S6 shows decreased  
960 phosphorylation, the translational repressor 4E-BP1 shows increased phosphorylation  
961 consistent with loss of repressive activity and indicating preferential activity through this  
962 effector node.

061119

963 H. IFT88KD myoblasts show increased global levels of protein synthesis. Protein synthesis  
964 was detected in Control and IFT88KD myoblasts which were placed under suspension  
965 arrest, using the Click-iT® Plus OPP Alexa Fluor® 488 Protein Synthesis Assay Kit (top  
966 panel), and the fluorescence levels were quantified in over 50 cells per sample (bottom  
967 panel).

968

969 **Fig. 5: A working model for primary cilium function in myoblast quiescence.**

970 Control myoblasts entering suspension induced quiescence elaborate primary cilia, which work  
971 to suppress proliferative signaling in G0, whereas myoblasts where ciliogenesis is blocked enter  
972 an altered quiescent state characterized by arrest in G2 and activation of G2/M checkpoint genes.

973

974

975

976

977



**Fig. 1**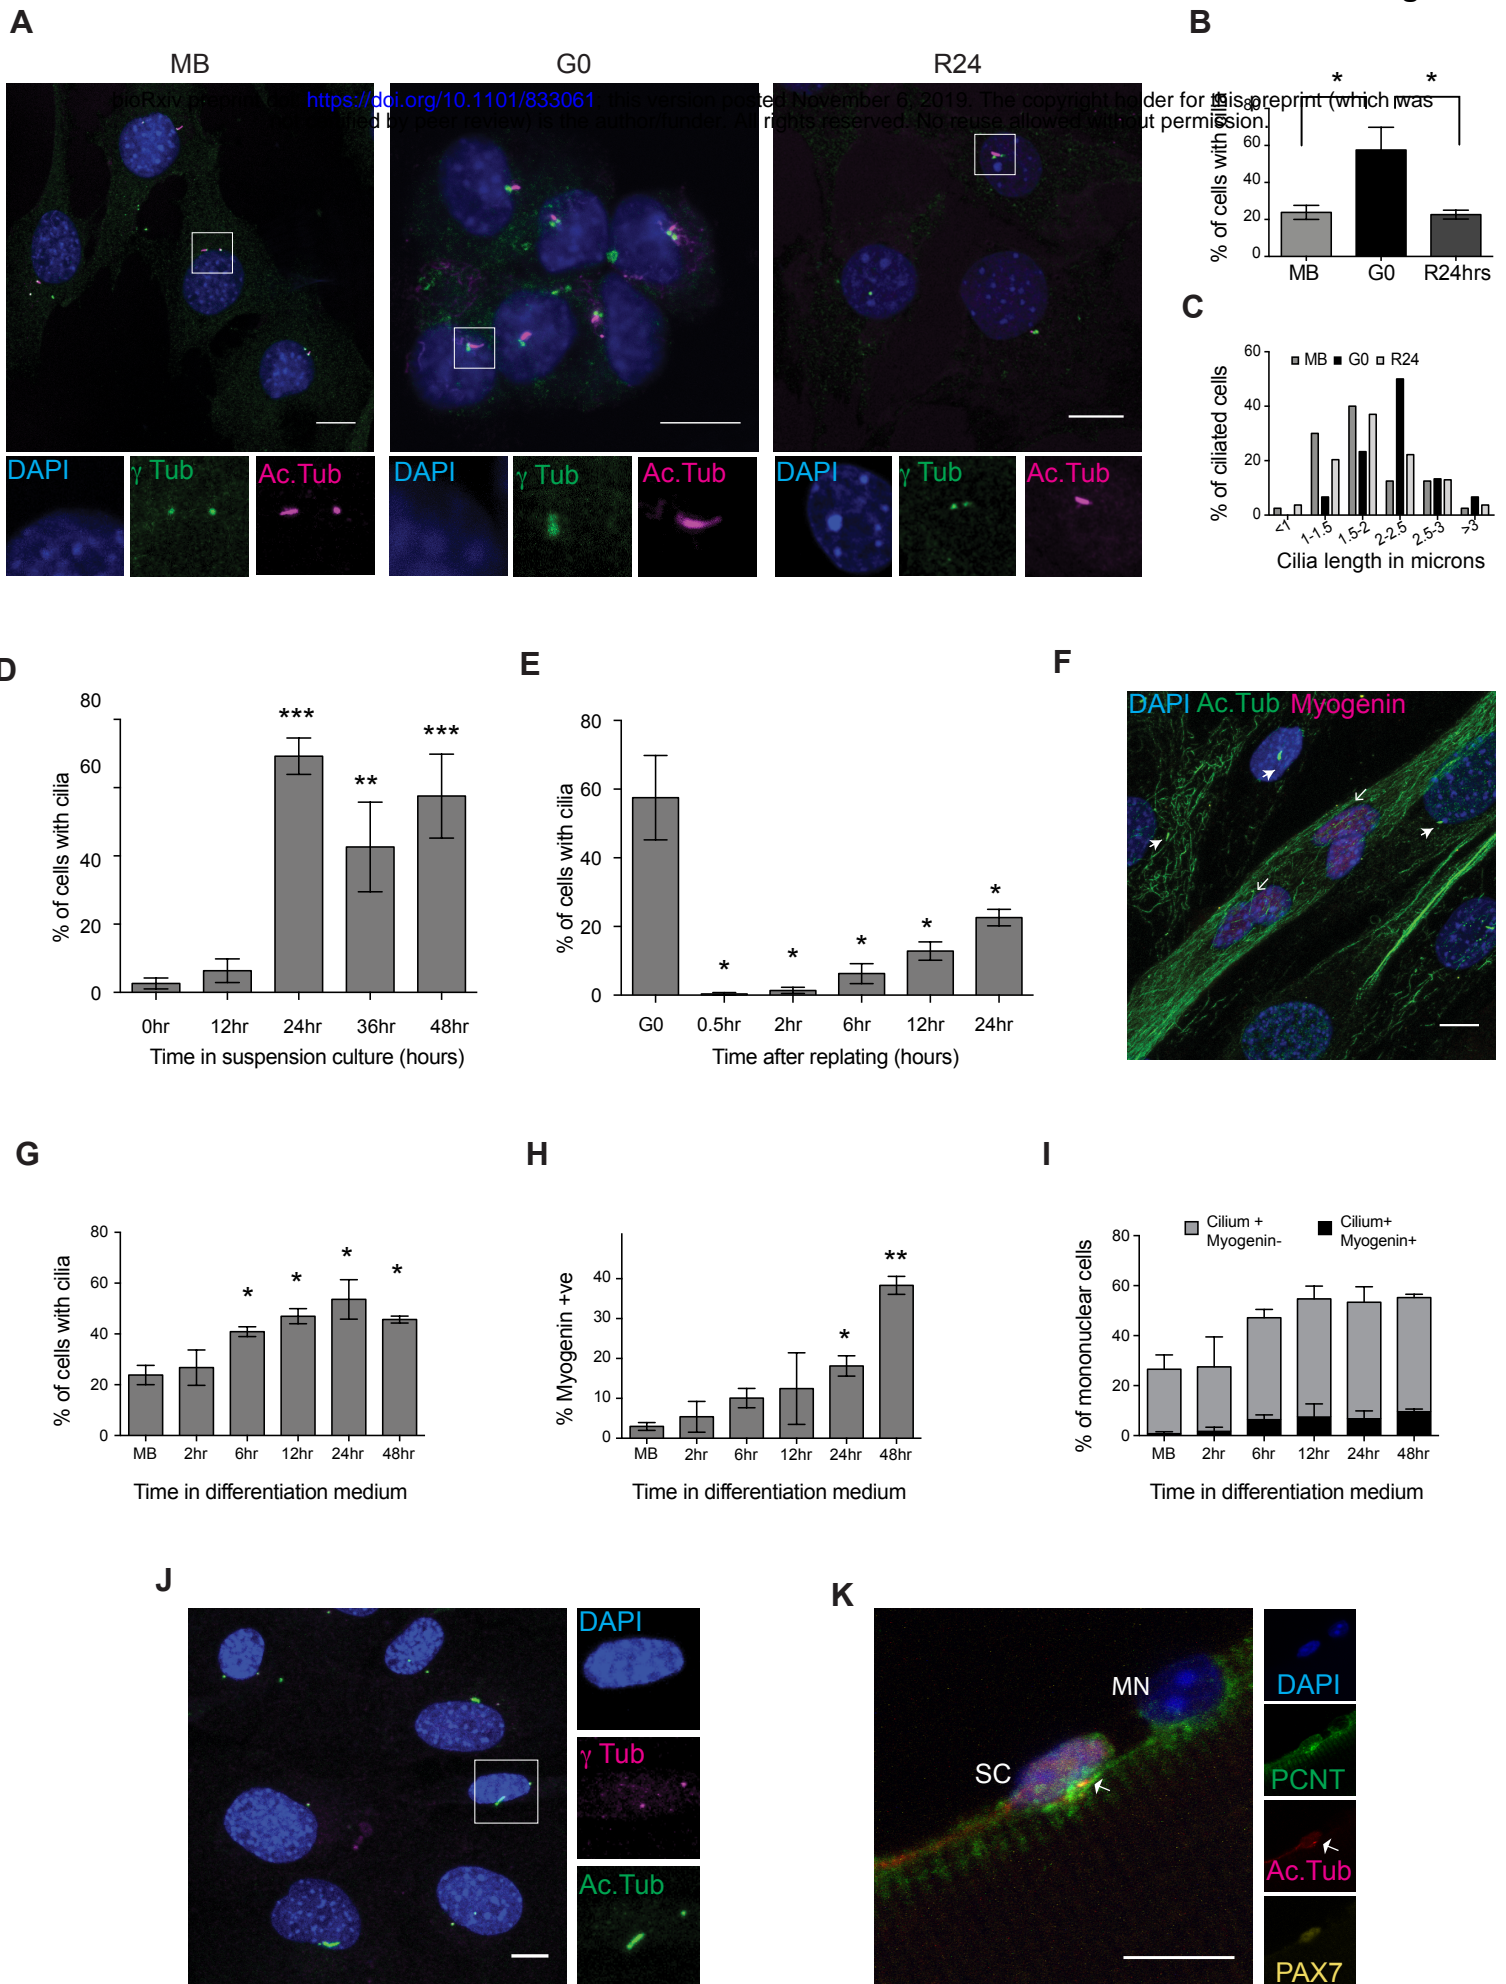



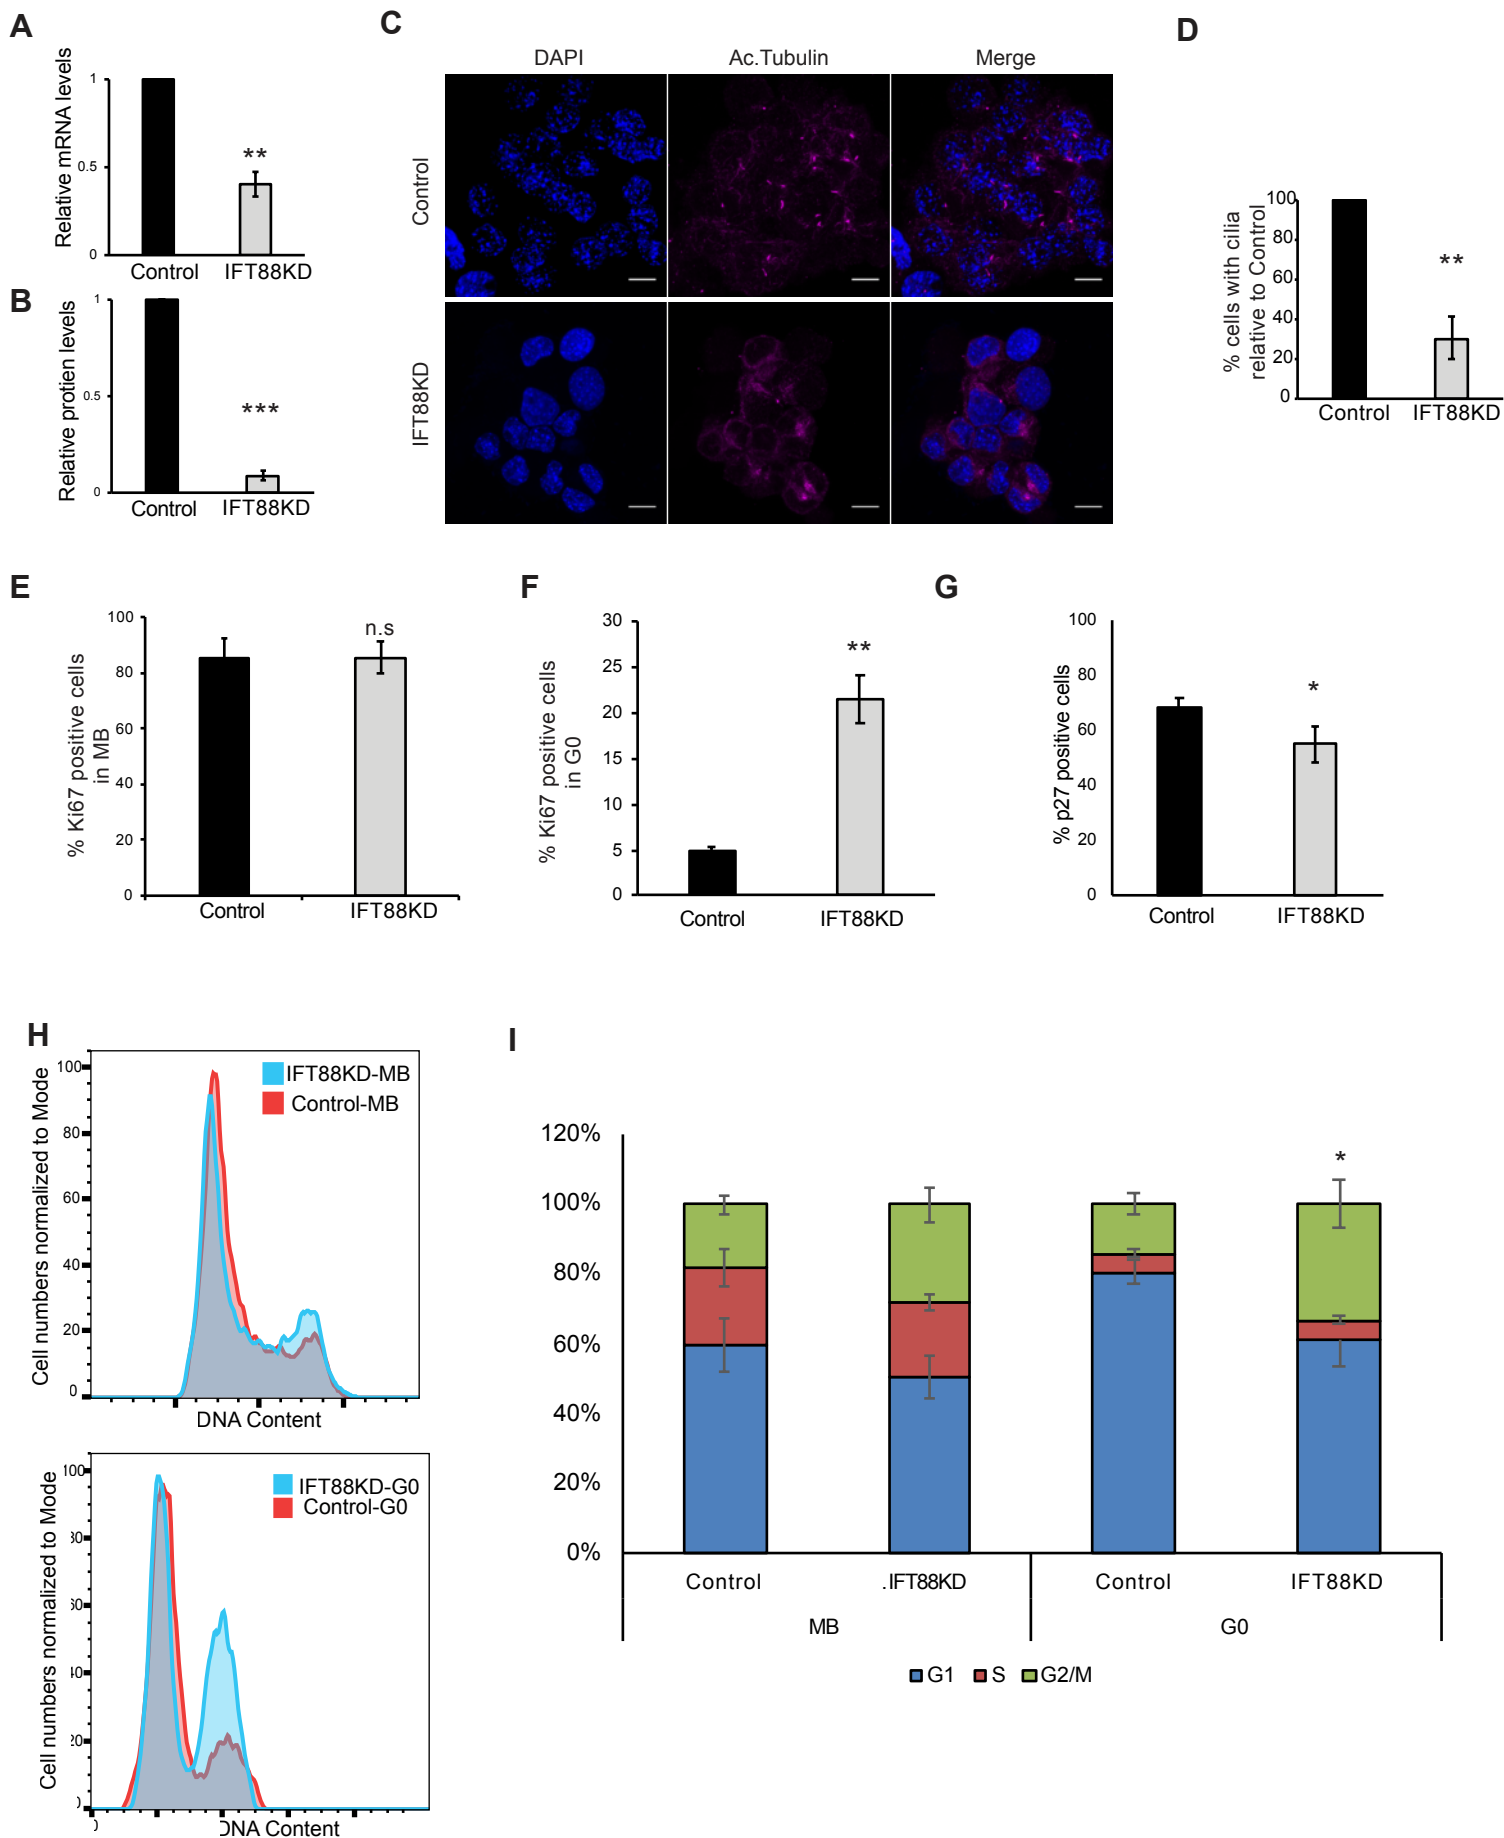

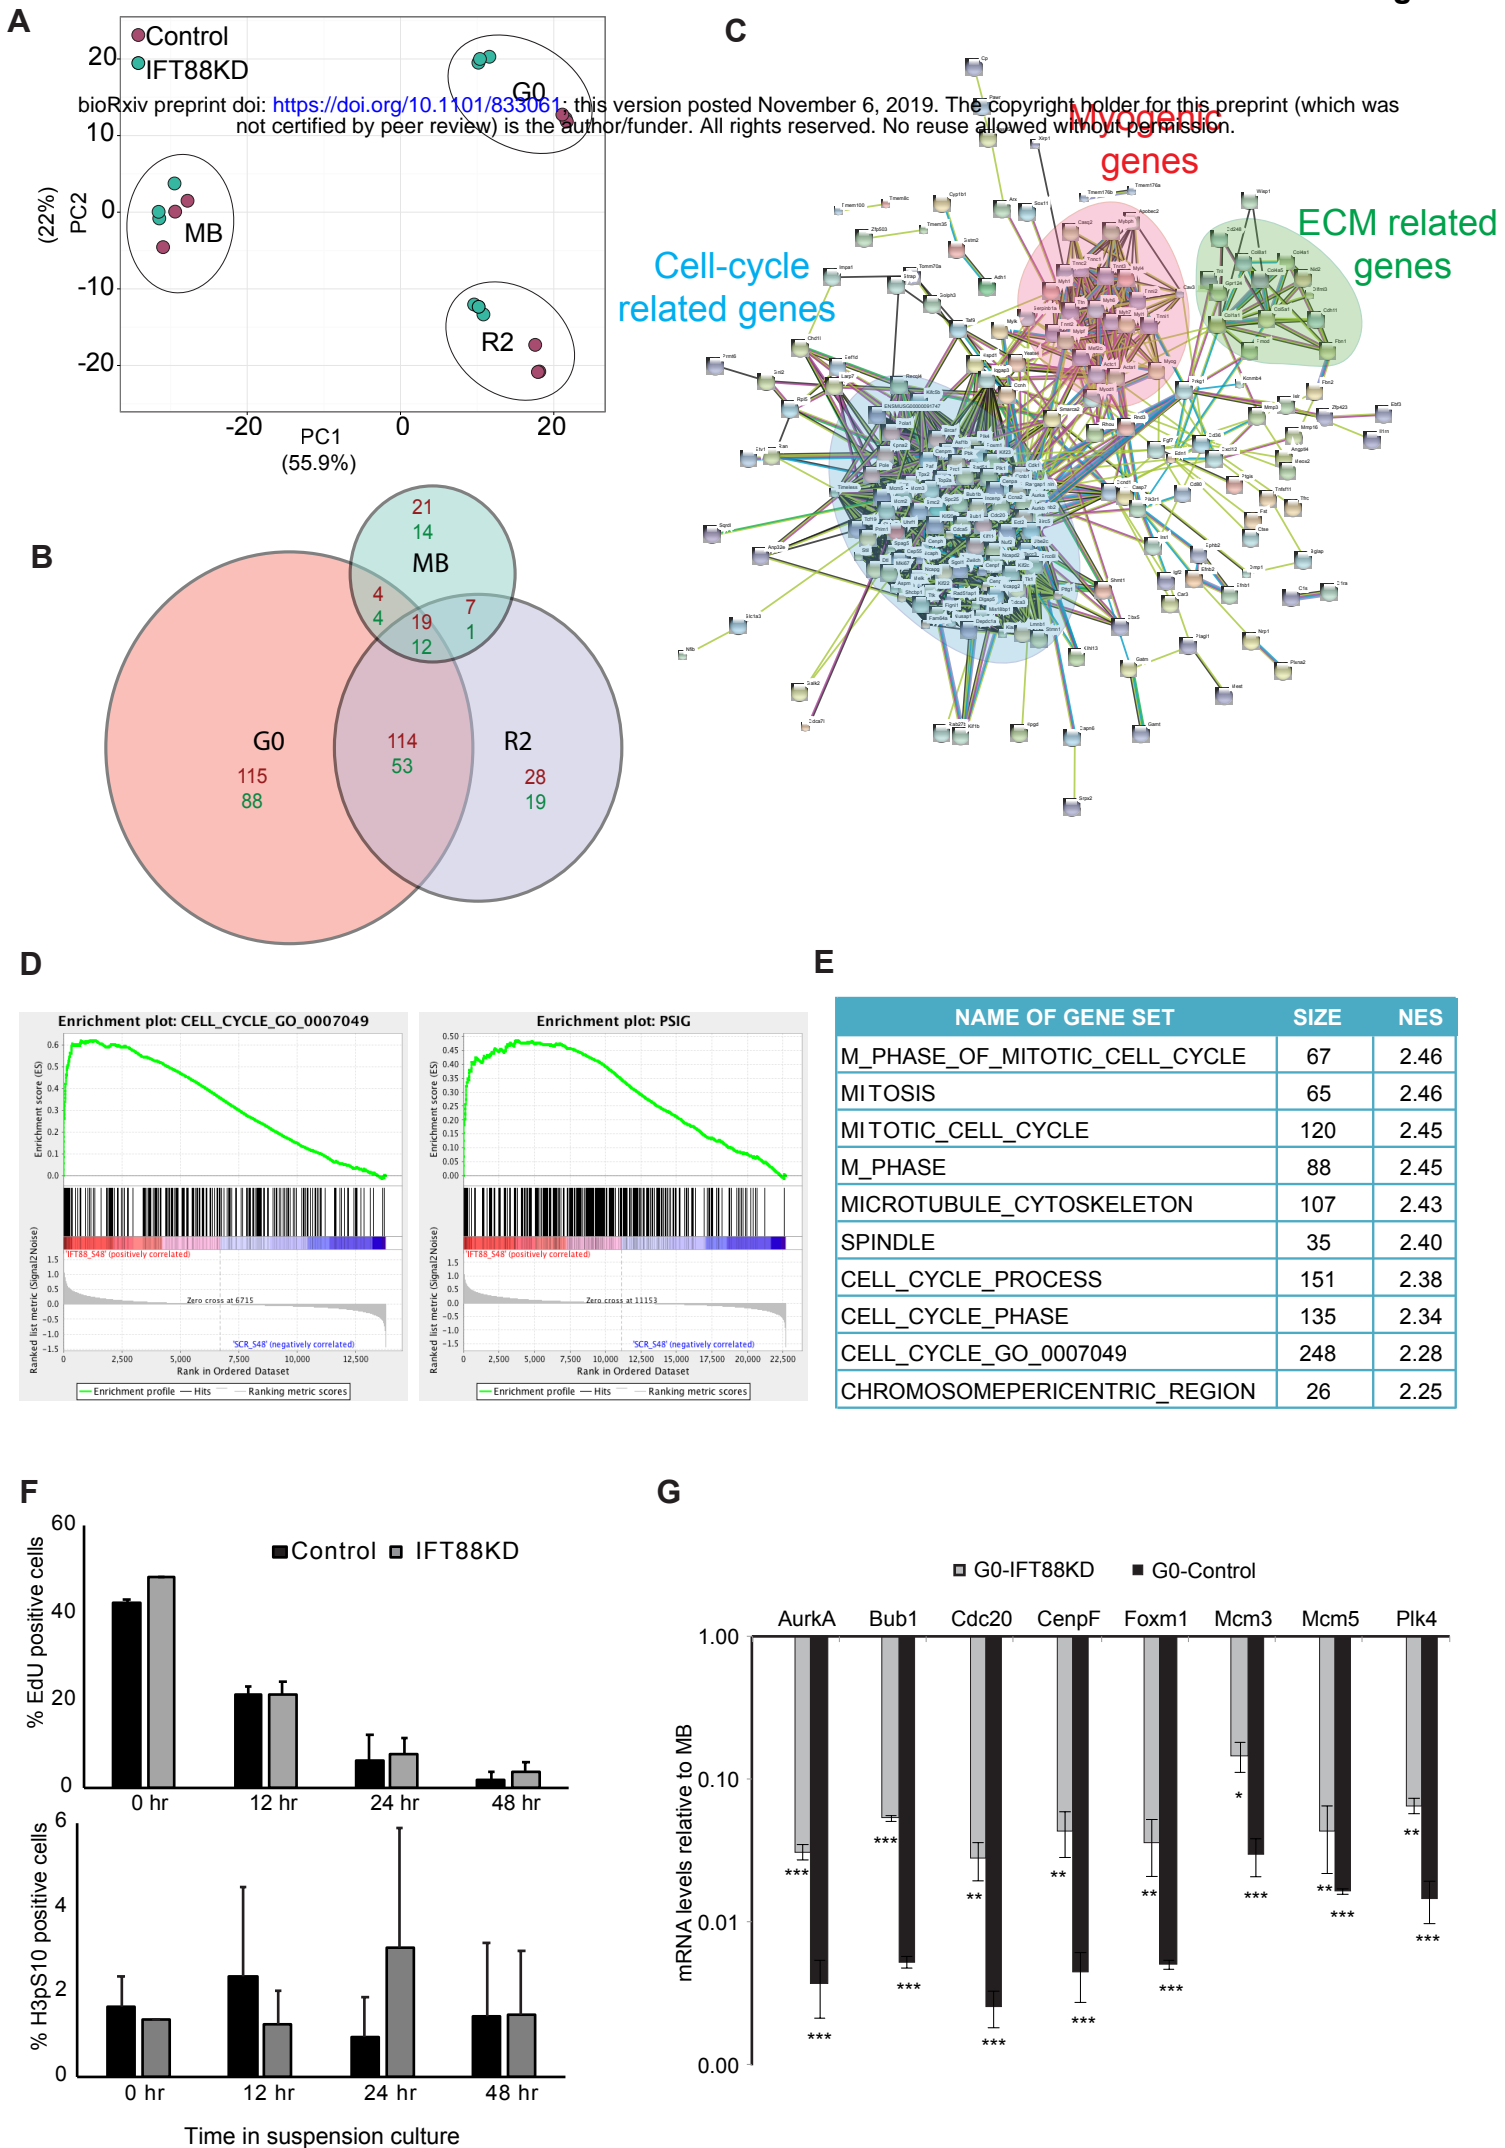

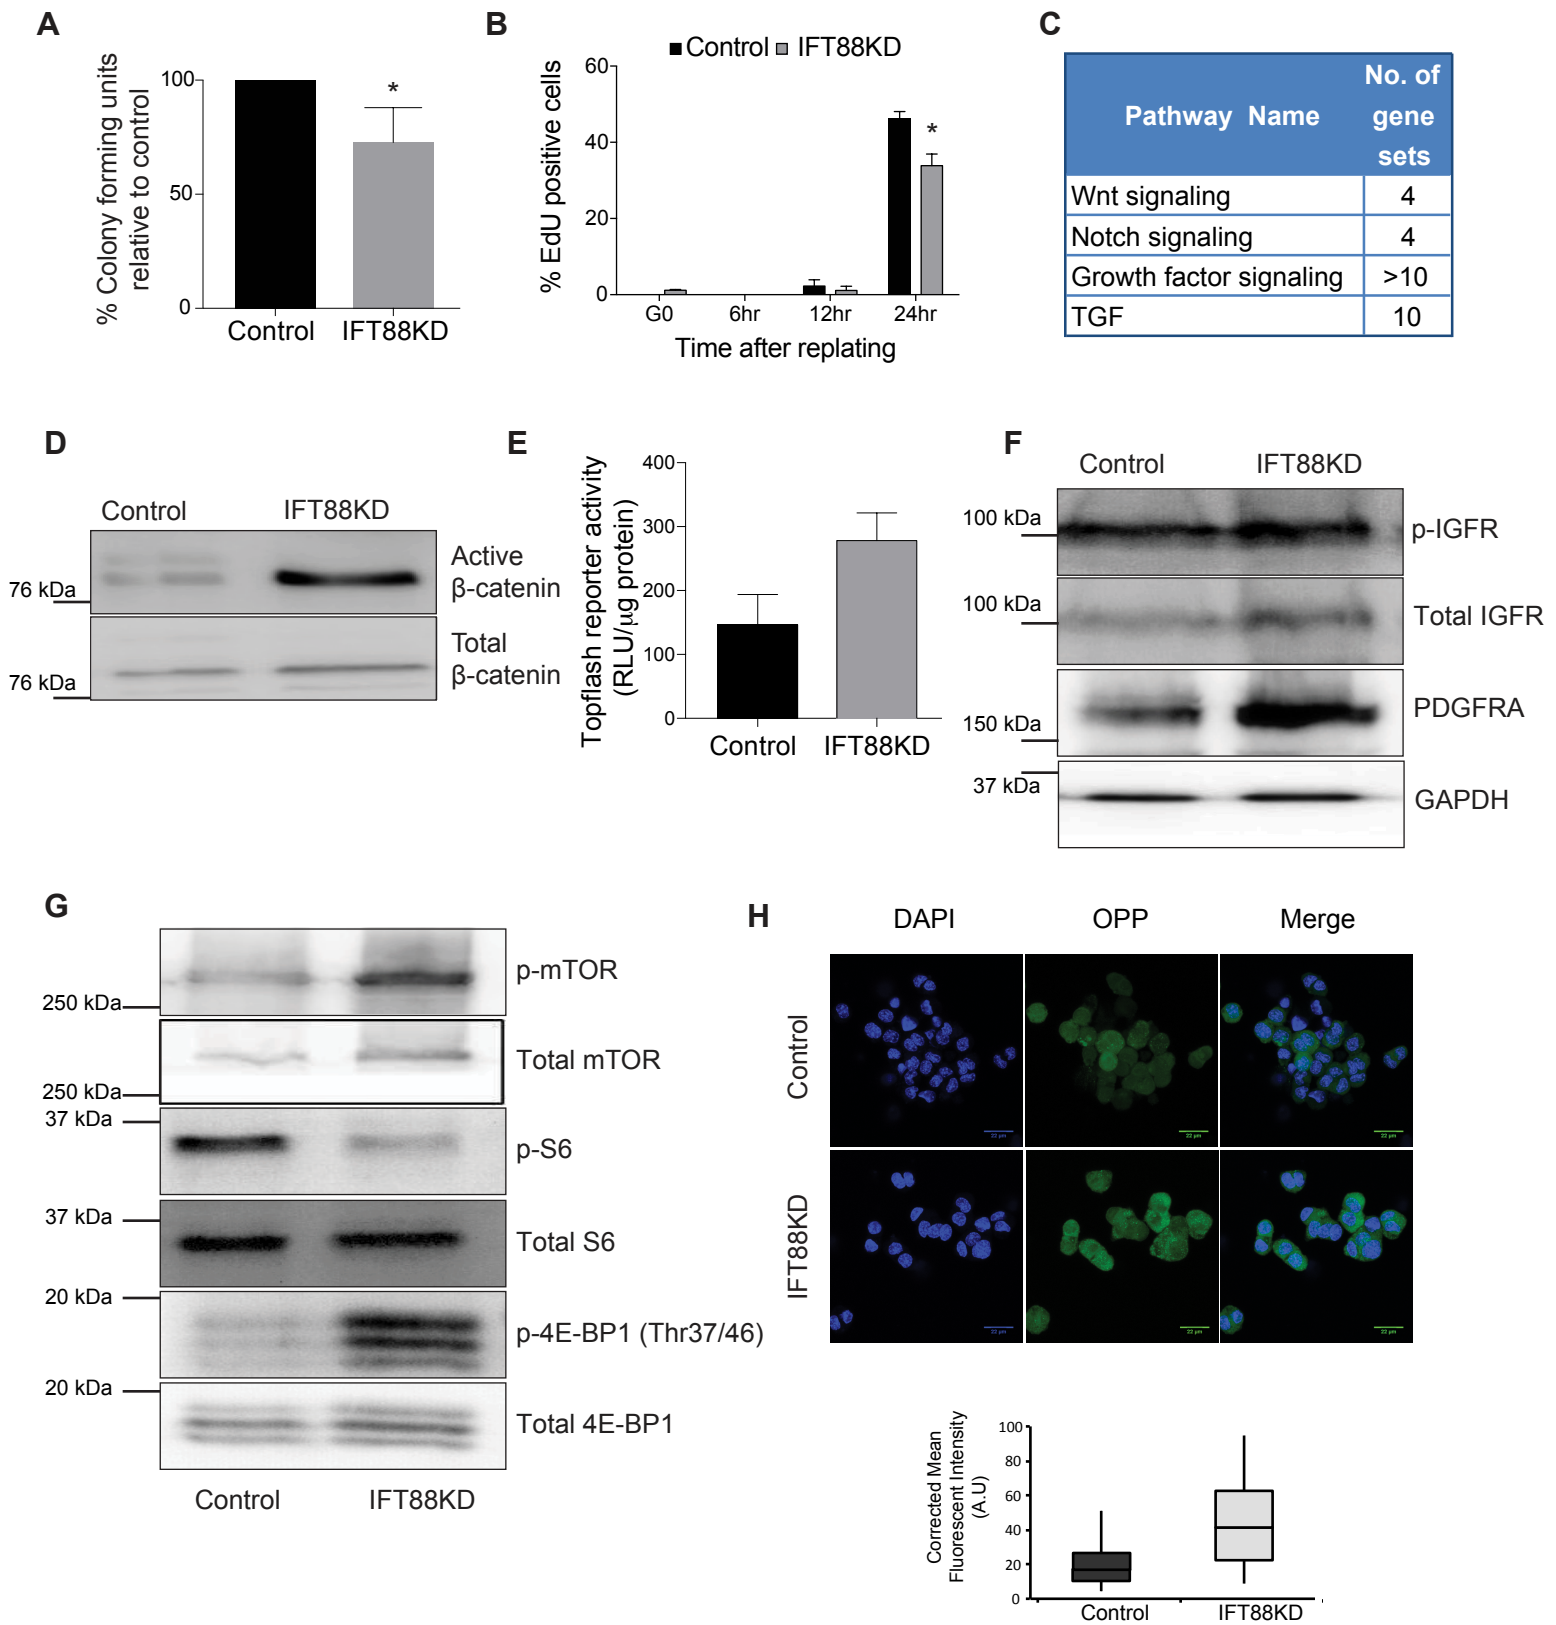

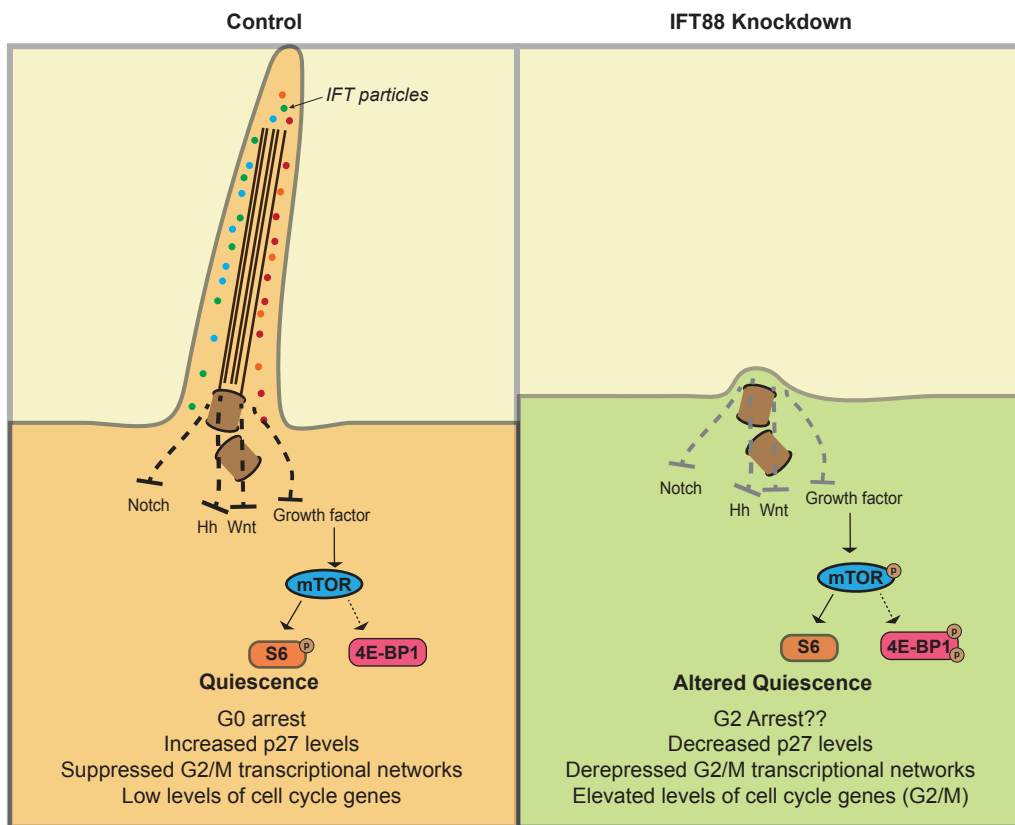

Source: http://biorxiv.org/content/10.1101/833061v1.full.pdf
